# Supplementary material for: Construction and optimization of microbial cell factories for sustainable production of bioactive dammarenediol-II glucosides
Source: Royal Society of Chemistry journal article supplement (doi:10.1039/c8gc04066d), 2019-01-01
Supplement: c8gc04066d1.pdf [file c8gc04066d1.pdf]

## Electronic Supplementary Information

### Construction and optimization of microbial cell factories for sustainable production of bioactive dammarenediol-II glucosides

Zong-Feng Hu<sup>1</sup>, An-Di Gu<sup>1</sup>, Lan Liang, Ting Gong, Yan Li, Jing-Jing Chen, Tian-Jiao Chen, Jin-Ling Yang\* and Ping Zhu\*

*State Key Laboratory of Bioactive Substance and Function of Natural Medicines & NHC Key Laboratory of Biosynthesis of Natural Products, Institute of Materia Medica, Chinese Academy of Medical Sciences & Peking Union Medical College, Beijing 100050, China.*

\* Corresponding authors.

E-mail addresses: yangjl@imm.ac.cn (J. L. Yang), zhuping@imm.ac.cn (P. Zhu).

<sup>1</sup> These authors contributed equally to this work.

## Table of contents

|     |                                                                                                                                                                                                            |    |
|-----|------------------------------------------------------------------------------------------------------------------------------------------------------------------------------------------------------------|----|
| 1   | Supplementary materials .....                                                                                                                                                                              | 3  |
| 1.1 | Plasmid and module construction .....                                                                                                                                                                      | 3  |
| 1.2 | Gene deletion cassette construction .....                                                                                                                                                                  | 9  |
| 2   | Supplementary figures .....                                                                                                                                                                                | 11 |
|     | Fig. S1 The design and construction of integration modules for <i>S. cerevisiae</i> transformation .....                                                                                                   | 11 |
|     | Fig. S2 SDS-PAGE of the cell extracts of <i>E. coli</i> recombinants .....                                                                                                                                 | 12 |
|     | Fig. S3 The <sup>1</sup> H NMR (A), <sup>13</sup> C NMR (B), HMBC (C) and HSQC (D) spectra of 3β- <i>O</i> -Glc-DM produced by <i>in vitro</i> reaction in methanol- <i>d</i> <sub>4</sub> .....           | 13 |
|     | Fig. S4 The <sup>1</sup> H NMR (A), <sup>13</sup> C NMR (B), HMBC (C) and HSQC (D) spectra of 20 <i>S</i> - <i>O</i> -Glc-DM produced by <i>in vitro</i> reaction in methanol- <i>d</i> <sub>4</sub> ..... | 15 |
|     | Fig. S5 The <sup>1</sup> H NMR (A), <sup>13</sup> C NMR (B), HMBC (C) and HSQC (D) spectra of 3β- <i>O</i> -Glc-DM produced by engineered yeast in methanol- <i>d</i> <sub>4</sub> .....                   | 17 |
|     | Fig. S6 The <sup>1</sup> H NMR (A), <sup>13</sup> C NMR (B), HMBC (C) and HSQC (D) spectra of 20 <i>S</i> - <i>O</i> -Glc-DM produced by engineered yeast in methanol- <i>d</i> <sub>4</sub> .....         | 19 |
|     | Fig. S7 Screening of yeast strains Y1C and Y2C .....                                                                                                                                                       | 21 |
|     | Fig. S8 Screening of yeast strains Y1CS and Y2CS .....                                                                                                                                                     | 23 |
| 3   | Supplementary tables .....                                                                                                                                                                                 | 26 |
|     | Table S1 Plasmids used in this study .....                                                                                                                                                                 | 26 |
|     | Table S2 Primers used for construction of plasmids and genome integration modules .....                                                                                                                    | 28 |
|     | Table S3 Primers used for construction of gene deletion cassettes .....                                                                                                                                    | 33 |
|     | Table S4 Primers used for qPCR .....                                                                                                                                                                       | 33 |
|     | Table S5 The HPLC conditions used in this study .....                                                                                                                                                      | 34 |
|     | Table S6 <sup>1</sup> H-NMR (600 MHz) and <sup>13</sup> C-NMR (150 MHz) spectral data of 3β- <i>O</i> -Glc-DM produced by <i>in vitro</i> reaction in methanol- <i>d</i> <sub>4</sub> .....                | 35 |
|     | Table S7 <sup>1</sup> H-NMR (600 MHz) and <sup>13</sup> C-NMR (150 MHz) spectral data of 20 <i>S</i> - <i>O</i> -Glc-DM produced by <i>in vitro</i> reaction in methanol- <i>d</i> <sub>4</sub> .....      | 36 |
|     | Table S8 <sup>1</sup> H-NMR (600 MHz) and <sup>13</sup> C-NMR (150 MHz) spectral data of 3β- <i>O</i> -Glc-DM produced by engineered yeast in methanol- <i>d</i> <sub>4</sub> .....                        | 37 |
|     | Table S9 <sup>1</sup> H-NMR (600 MHz) and <sup>13</sup> C-NMR (150 MHz) spectral data of 20 <i>S</i> - <i>O</i> -Glc-DM produced by engineered yeast in methanol- <i>d</i> <sub>4</sub> .....              | 38 |

---

## 1 Supplementary materials

### 1.1 Plasmid and module construction

#### Construction of genome integration module I : $\delta I-1-P_{TEF1}-synDS-GFP-T_{CYC1}-P_{PGK1}-tHMG1-T_{ADH1}$ (Fig. S1)

*DS* was synthesized according to the codon bias of *Saccharomyces cerevisiae* and fused with *GFP* by overlap extension PCR (OE-PCR) to generate pESC-HIS-DS-GFP. The *synDS-GFP* gene was amplified with primers DS-TEF1-F and DS-CYC1-R using pESC-HIS-DS-GFP as the template, *TEF1* promoter ( $P_{TEF1}$ ) and *CYC1* terminator ( $T_{CYC1}$ ) were amplified from the genomic DNA of *S. cerevisiae* INVSc1 using primer sets A-TEF1-Delta1-F/TEF1-DS-R and CYC1-DS-F/CYC1-PGK1-R. The purified fragments *TEF1*, *synDS-GFP*, *CYC1* were joined through OE-PCR using primers A-TEF1-Delta1-F and CYC1-PGK1-R to generate  $P_{TEF1}-synDS-GFP-T_{CYC1}$ , and cloned into pEASY-Blunt-Zero, resulting in pEASY-DS-GFP. Homologous recombination region of  $\delta$  site was amplified from the genomic DNA of *S. cerevisiae* INVSc1 using primers Delta1-2F/Delta2-1R, and cloned into pEASY-Blunt-Simple, resulting in pEASY-IN $\delta$ . Fragment  $\delta I-1$  was amplified from plasmid pEASY-IN $\delta$  using primers Delta1-2F/Delta1-TEF1-2R. Fragments  $\delta I-1$  and  $P_{TEF1}-synDS-GFP-T_{CYC1}$  were joined through OE-PCR using primers Delta1-2F and CYC1-PGK1-R to generate  $\delta I-1-P_{TEF1}-synDS-GFP-T_{CYC1}$ .

Fragment  $P_{PGK1}-tHMG1-T_{ADH1}$  was amplified as follows. The *tHMG1* gene, *PGK1* promoter ( $P_{PGK1}$ ) and *ADH1* terminator ( $T_{ADH1}$ ) were amplified from the chromosome DNA of *S. cerevisiae* YPH499 using primer sets PGK1-CYC1-F/PGK1-*tHMG1*-R, *tHMG1*-PGK1-F/*tHMG1*-ADH1-R, ADH1-*tHMG1*-F/ADH1-R. The purified fragments *PGK1*, *ADH1*, *tHMG1* were joined through OE-PCR using primers PGK1-CYC1-F and ADH1-TDH3-R to generate  $P_{PGK1}-tHMG1-T_{ADH1}$ , and cloned into pEASY-Blunt-Zero, resulting in pEASY-*tHMG1*.

The purified fragments  $\delta I-1-P_{TEF1}-synDS-GFP-T_{CYC1}$  and  $P_{PGK1}-tHMG1-T_{ADH1}$  were used as the template and joined through OE-PCR using primers Delta1-2F/ADH1-TDH3-R to generate the 6386 bp of genome integration module  $\delta I-1-$

---

$P_{TEF1}$ -*synDS-GFP*- $T_{CYC1}$ - $P_{PGK1}$ -*tHMG1*- $T_{ADH1}$ , and cloned into pEASY-Blunt-Zero, resulting in pEASY-3, then verified by DNA sequencing.

**Construction of genome integration module II: *overlap-P<sub>TDH3</sub>-synPgUGT74AE2-T<sub>ADH2</sub>-HIS- $\delta$ 1-2* (Fig. S1)**

To generate an overlap of approximately 400 to 500 bp, a fragment consisting of a sequence of the last 450 nucleotides was amplified from plasmid pEASY-3 using primers B-400F/ADH1-TDH3-R. *TDH3* promoter ( $P_{TDH3}$ ) and *ADH2* terminator ( $T_{ADH2}$ ) were amplified from the chromosome DNA of *S. cerevisiae* YPH499 using primer sets TDH3-ADH1-F/TDH3-UGT74AE2-R and ADH2-UGT74AE2-F/ADH2-HIS-R. The codon-optimized *synPgUGT74AE2* was amplified from the plasmid pUC57-PgUGT74AE2 with primers UGT74AE2-TDH3-F/UGT74AE2-ADH2-R. *TDH3*, *ADH2*, *synPgUGT74AE2* were fused by OE-PCR using primers TDH3-ADH1-F and ADH2-HIS-R, and cloned into pEASY-Blunt-Zero, resulting in pEASY-PgUGT74AE2. The purified 450 bp fragments and *TDH3p-synPgUGT74AE2-ADH2t* were joined through OE-PCR using primers B400-F and ADH2-HIS-R to generate *overlap-TDH3p-synPgUGT74AE2-ADH2t*.

The auxotrophic marker gene *HIS* was amplified using plasmid pESC-HIS as the template with primers HIS-ADH2-F and HIS-Delta2-R. Fragment  $\delta$ 1-2 was amplified from plasmid pEASY-IN $\delta$  using primers Delta2-HIS-1F/Delta2-1R. These two fragments were purified and joined through OE-PCR using primers HIS-ADH2-F and Delta2-1R to generate *HIS- $\delta$ 1-2*.

The purified fragments *overlap-P<sub>TDH3</sub>-synPgUGT74AE2-T<sub>ADH2</sub>* and *HIS- $\delta$ 1-2* were used as the template and joined through OE-PCR using primers B400-F/Delta2-1R to generate the 4571 bp of genome integration module *overlap-TDH3p-synPgUGT74AE2-ADH2t-HIS- $\delta$ 1-2*, and cloned into pEASY-Blunt-Zero, resulting in pEASY-1, then verified by DNA sequencing.

**Construction of genome integration module III: *overlap-P<sub>TDH3</sub>-synUGTPg1-T<sub>ADH2</sub>-HIS- $\delta$ 1-2* (Fig. S1)**

To generate an overlap of approximately 400 to 500 bp, a fragment consisting of a sequence of the last 450 nucleotides was amplified from plasmid pEASY-3 using primers B-400F/ADH1-TDH3-R. *TDH3* promoter ( $P_{TDH3}$ ) and *ADH2* terminator ( $T_{ADH2}$ ) were amplified from the chromosome DNA of *S. cerevisiae* YPH499 using

primer sets TDH3-ADH1-F/TDH3-UGTPg1-R and ADH2-UGTPg1-F/ADH2-HIS-R. The codon-optimized *UGTPg1* was amplified from the plasmid pUC57-UGTPg1 with primers UGTPg1-TDH3-F/UGTPg1-ADH2-R. *TDH3*, *synUGTPg1*, *ADH2* were fused by OE-PCR using primers TDH3-ADH1-F and ADH2-HIS-R, and cloned into pEASY-Blunt-Zero, resulting in pEASY-UGTPg1. The purified 450 bp fragments and *P<sub>TDH3</sub>-synUGTPg1-T<sub>ADH2</sub>* were joined through OE-PCR using primers B400-F and ADH2-HIS-R to generate *overlap-P<sub>TDH3</sub>-synUGTPg1-T<sub>ADH2</sub>*.

The purified fragments *overlap-P<sub>TDH3</sub>-synUGTPg1-T<sub>ADH2</sub>* and *HIS- $\delta$ 1-2* were used as the template and joined through OE-PCR using primers B400-F/Delta2-1R to generate the 4646 bp of genome integration module *overlap-P<sub>TDH3</sub>-synUGTPg1-T<sub>ADH2</sub>-HIS- $\delta$ 1-2* and cloned into pEASY-Blunt-Zero, resulting in pEASY-2, then verified by DNA sequencing.

#### **Construction of genome integration module IV: $\delta$ 4-1-*P<sub>TDH3</sub>-IDI1-T<sub>TPI1</sub>-P<sub>PGK1</sub>-ERG20-T<sub>ADH1</sub>* (Fig. S1)**

The  $\delta$ 4-1 sequence was amplified from the genomic DNA of *S. cerevisiae* YPH499 using primers TY4-F1 and TY4-R2, and cloned into pEASY-Blunt-Simple, resulting in pEASY-TY4. PCR amplification of the 282 bp of the  $\delta$ 4 sequence of TY4 transposon was performed with primers TY4-F1 and TY4-1-TDH3-R from pEASY-TY4. The *IDI1* gene, *TDH3* promoter (*P<sub>TDH3</sub>*) and *TPI1* terminator (*T<sub>TPI1</sub>*) were amplified from pEASY-TY4 using primer sets TDH3-TY4-1-F/TDH3-IDI1-R, IDI1-TDH3-F/IDI1-TPI1-R and TPI1-IDI1-F/TPI1-PGK1-R, and fused by OE-PCR with primers TDH3-TY4-1-F/TPI1-PGK1-R, and cloned into pEASY-Blunt-Zero, resulting in pEASY-IDI1. The purified fragments  $\delta$ 4-1 and *P<sub>TDH3</sub>-IDI1-T<sub>TPI1</sub>* were joined through OE-PCR using primers TY4-F1 and TPI1-PGK1-R to generate  $\delta$ 4-1-*P<sub>TDH3</sub>-IDI1-T<sub>TPI1</sub>*.

The *ERG20* gene, *PGK1* promoter (*P<sub>PGK1</sub>*) and *ADH1* terminator (*T<sub>ADH1</sub>*) were amplified from the chromosome DNA of *S. cerevisiae* YPH499 using primer sets PGK1-TPI1-F/PGK1-ERG20-R, ERG20-PGK1-F/ERG20-ADH1-R and ADH1-ERG20-F/ADH1-TEF1-R. The purified fragments *PGK1*, *ADH1*, *ERG20* were joined through OE-PCR using primers PGK1-TPI1-F and ADH1-TEF1-R to generate *P<sub>PGK1</sub>-ERG20-T<sub>ADH1</sub>*, and cloned into pEASY-Blunt-Zero, resulting in pEASY-ERG20.

The purified fragments  $\delta$ 4-1-*P<sub>TDH3</sub>-IDI1-T<sub>TPI1</sub>* and *P<sub>PGK1</sub>-ERG20-T<sub>ADH1</sub>* were used as the template and joined through OE-PCR using primers TY4-F1/ADH1-TEF1-R to

---

generate the 4282 bp of genome integration module  $\delta 4$ -I- $P_{TDH3}$ - $IDII$ - $T_{TPII}$ - $P_{PGK1}$ - $ERG20$ - $T_{ADH1}$ , and cloned into pEASY-Blunt, resulting in pEASY-S28, then verified by DNA sequencing.

**Construction of genome integration module VI:  $P_{PGK1}$ - $ERG1$ - $T_{ADH1}$ - $P_{TEF1}$ - $ERG7$ - $T_{CYC1}$ - $LEU$ - $\delta 4$ -2 (Fig. S1)**

PCR amplification of the  $ERG1$  gene,  $PGK1$  promoter ( $P_{PGK1}$ ) and  $ADH1$  terminator ( $T_{ADH1}$ ) was performed from the chromosome DNA of *S. cerevisiae* YPH499 with primer sets  $ERG1$ - $PGK1$ -F/ $ERG1$ - $ADH1$ -R,  $PGK1$ - $CYC1$ -F/ $PGK1$ - $ERG1$ -R and  $ADH1$ - $ERG1$ -F/ $ADH1$ - $TEF1$ -R. The purified fragments  $PGK1$ ,  $ADH1$ ,  $ERG1$  were joined through OE-PCR using primers  $PGK1$ - $CYC1$ -F and  $ADH1$ - $TEF1$ -R to generate  $P_{PGK1}$ - $ERG1$ - $T_{ADH1}$ , and cloned into pEASY-Blunt-Zero, resulting in pEASY- $ERG1$ .

The  $ERG7$  antisense gene was amplified with primers  $ERG7$ - $TEF1$ -F/ $ERG7$ - $CYC1$ -R using plasmid pESC-URA- $ERG7$  as the template.  $TEF1$  promoter ( $P_{TEF1}$ ) and  $CYC1$  terminator ( $T_{CYC1}$ ) were amplified from the chromosome DNA of *S. cerevisiae* YPH499 using primer sets  $TEF1$ - $ADH1$ -F / $TEF1$ - $ERG7$ -R and  $CYC1$ - $ERG7$ -F/ $CYC1$ - $LEU$ -R. The purified fragments  $TEF1$ ,  $CYC1$ ,  $ERG7$  were joined through OE-PCR using primers  $TEF1$ - $ADH1$ -F and  $CYC1$ - $LEU$ -R to generate  $P_{TEF1}$ - $ERG7$ - $T_{CYC1}$ , and cloned into pEASY-Blunt-Zero, resulting in pEASY- $ERG7$ .

PCR amplification of the 234 bp of the  $\delta 4$  sequence was performed with primers TY4-2- $LEU$ -F and TY4-2R using YPH499 chromosome DNA as the template. PCR amplification of the auxotrophic marker  $LEU$  was performed with primers  $LEU$ - $CYC1$ -F and  $LEU$ -TY4-2-R using plasmid pESC- $LEU$  (Invitrogen, USA) as the template. The purified fragments  $LEU$ ,  $\delta 4$ -2 were joined through OE-PCR using primers  $LEU$ - $CYC1$ -F and TY4-2R to generate fragment  $LEU$ - $\delta 4$ -2.

The purified fragments  $P_{PGK1}$ - $ERG1$ - $T_{ADH1}$ ,  $P_{TEF1}$ - $ERG7$ - $T_{CYC1}$  and  $LEU$ - $\delta 4$ -2 were used as the template and joined through OE-PCR using primers  $PGK1$ - $CYC1$ -F and TY4-2R to generate 6925 bp of genome integration module  $P_{PGK1}$ - $ERG1$ - $T_{ADH1}$ - $P_{TEF1}$ - $ERG7$ - $T_{CYC1}$ - $LEU$ - $\delta 4$ -2, and cloned into pEASY-Blunt, resulting in pEASY-S1319, then verified by DNA sequencing.

**Construction of genome integration module V: *overlap*- $P_{TEF1}$ - $ERG9$ - $T_{CYC1}$ -*overlap* (Fig. S1)**

To generate an overlap of approximately 300 to 500 bp, a fragment consisting of a sequence of the last 515 nucleotides was amplified from plasmid pEASY-S28 using primers S28-400F/TEF1-ERG9-R. Another fragment consisting of a sequence of the first 550 nucleotides was amplified from plasmid pEASY-S1319 using primers PGK1-CYC1-F/S1319-400R. PCR amplification of the *ERG9* gene, *TEF1* promoter ( $P_{TEF1}$ ) and *CYC1* terminator ( $T_{CYC1}$ ) was performed with primer sets TEF1-ADH1-F/TEF1-ERG9-R, ERG9-TEF1-F/ERG9-CYC1-R and CYC1-ERG9-F/CYC1-PGK1-R from the chromosome DNA of *S. cerevisiae* YPH499. Then 100 ng each of the purified fragments *TEF1*, *CYC1*, *ERG9* were joined through OE-PCR using primers TEF1-ADH1-F and CYC1-PGK1-R to generate  $P_{TEF1}$ -*ERG9*- $T_{CYC1}$ , and cloned into pEASY-Blunt-Zero, resulting in pEASY-ERG9.

The purified fragments mentioned above were used as the template and joined through OE-PCR using primers S28-400F and S1319-400R to give the genome integration module *overlap*- $P_{TEF1}$ -*ERG9*- $T_{CYC1}$ -*overlap*, and cloned into pEASY-Blunt, resulting in pEASY-S813, then verified by DNA sequencing.

### Construction of plasmid p-TRP-rDNA:

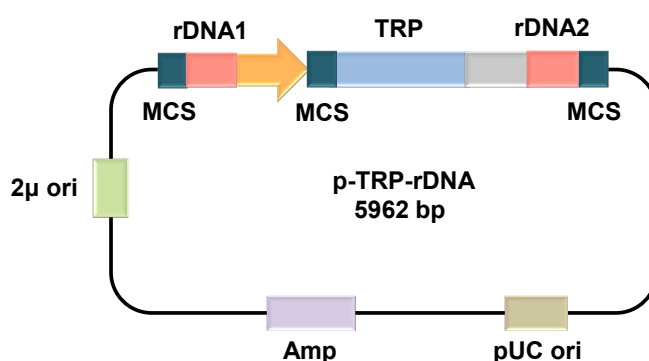

The *rDNA* sequence was amplified from the genomic DNA of *S. cerevisiae* YPH499 using primers rDNA1-MQWD-F and rDNA2-MQWD-R, resulting in pEASY-rDNA. PCR amplification of the 766 bp of the *rDNA* sequence was performed with primers GJ-rDNA1-2μ-F and rDNA1-MQWD-R from pEASY-rDNA, and PCR amplification of the 628 bp of the *rDNA* sequence was performed with primers rDNA2-TRP-F and GJ-rDNA2-PUC-R from pEASY-rDNA. The auxotrophic marker *TRP* was amplified with primers TRP-MQWD-F and TRP-rDNA2-R using plasmid pESC-TRP (Invitrogen, USA) as the template. The plasmid scaffold was amplified with primers PUC-GJ-rDNA2-F and 2μ-GJ-rDNA1-R using plasmid pESC-TRP (Invitrogen, USA) as the template. The four purified fragments mentioned above

---

were joined using the In-Fusion Cloning Kit (Clontech), resulting in p-TRP-rDNA, then verified by DNA sequencing.

**Construction of genome integration module VII: *rDNA1-P<sub>TEF1</sub>-BiP-T<sub>CYC1</sub>-TRP-rDNA2* (Fig. S1)**

The *BiP* gene, *TEF1* promoter (*P<sub>TEF1</sub>*) and *CYC1* terminator (*T<sub>CYC1</sub>*) were amplified from the chromosome DNA of *S. cerevisiae* YPH499 using primer sets GJ-F/*TEF1*-BIP-R, BIP-*TEF1*-F/BIP-*CYC1*-R and *CYC1*-BIP-F/GJ-R. The purified fragments *BiP*, *TEF1*, *CYC1* were joined through OE-PCR using primers GJ-F and GJ-R to generate *P<sub>TEF1</sub>-BiP-T<sub>CYC1</sub>*, and cloned into pEASY-Blunt-Zero, resulting in pEASY-BiP. Fragment *P<sub>TEF1</sub>-BiP-T<sub>CYC1</sub>* was amplified from pEASY-BiP using primers GJ-F and GJ-R, and cloned into plasmid p-TRP-rDNA at *Sal* I and *Xho* I sites, resulting in p-TRP-BiP, then verified by DNA sequencing. DNA integration module VII was obtained from plasmid p-TRP-BiP digested with *Bam*H I and *Sac* I.

**Construction of genome integration module VIII: *rDNA1-P<sub>TEF1</sub>-HAC1-T<sub>CYC1</sub>-TRP-rDNA2* (Fig. S1)**

The *HAC1* gene, *TEF1* promoter (*P<sub>TEF1</sub>*) and *CYC1* terminator (*T<sub>CYC1</sub>*) were amplified from the chromosome DNA of *S. cerevisiae* YPH499 using primer sets GJ-F/*TEF1*-HAC1-R, HAC1-*TEF1*-F/HAC1-*CYC1*-R and *CYC1*-HAC1-F/GJ-R. The purified fragments *HAC1*, *TEF1*, *CYC1* were joined through OE-PCR using primers GJ-F and GJ-R to generate *P<sub>TEF1</sub>-HAC1-T<sub>CYC1</sub>*, and cloned into pEASY-Blunt-Zero, resulting in pEASY-HAC1. Fragment *P<sub>TEF1</sub>-HAC1-T<sub>CYC1</sub>* was amplified from pEASY-HAC1 using primers GJ-F and GJ-R, and cloned into plasmid p-TRP-rDNA at *Sal* I and *Xho* I sites, resulting in p-TRP-HAC1, then verified by DNA sequencing. DNA integration module VIII was obtained from plasmid p-TRP-HAC1 digested with *Bam*H I and *Sac* I.

**Construction of genome integration module IX: *rDNA1-P<sub>TEF1</sub>-PDII-T<sub>CYC1</sub>-TRP-rDNA2* (Fig. S1)**

The *PDII* gene, *TEF1* promoter (*P<sub>TEF1</sub>*) and *CYC1* terminator (*T<sub>CYC1</sub>*) were amplified from the genome DNA of *S. cerevisiae* YPH499 using primer sets GJ-F/*TEF1*-PDI-R, PDI1-*TEF1*-F/HAC1-*CYC1*-R and *CYC1*-PDI1-F/GJ-R. The purified fragments *PDII*, *TEF1*, *CYC1* were joined through OE-PCR using primers GJ-F and GJ-R to generate *P<sub>TEF1</sub>-PDII-T<sub>CYC1</sub>*, and cloned into pEASY-Blunt-Zero,



resulting in pEASY-PDI1. Fragment  $P_{TEF1}$ - $PDI1$ - $T_{CYC1}$  was amplified from pEASY-PDI1 using primers GJ-F and GJ-R, and cloned into plasmid p-TRP-rDNA at *Sal* I and *Xho* I sites, resulting in p-TRP-PDI1, then verified by DNA sequencing. DNA integration module IX was obtained from plasmid p-TRP-PDI1 digested with *Bam*H I and *Sac* I.

### Construction of p-Cas9-gRNA:

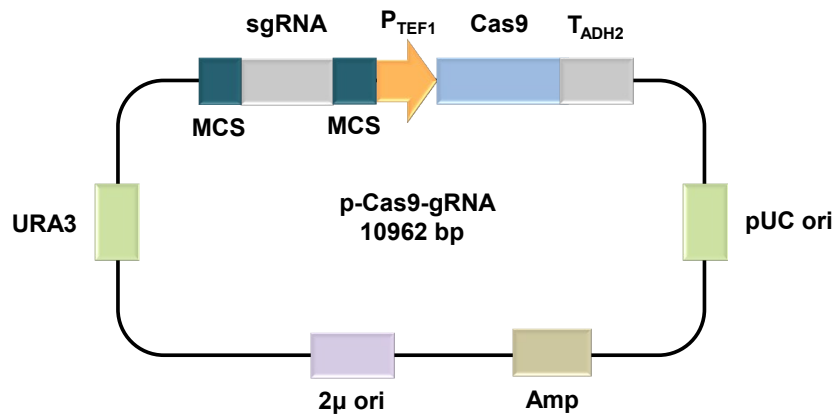

For the construction of Cas9 and gRNA co-expressing plasmid, the 4272 bp of human codon-optimized *cas9* was amplified with primers Cas9-TEF1-F and Cas9-ADH2-R from plasmid FM-1, and *TEF1* promoter ( $P_{TEF1}$ ) and *ADH2* terminator ( $T_{ADH2}$ ) were amplified from the chromosome DNA of *S. cerevisiae* YPH499 using primer sets TEF1-SUP4t-MSC-F/TEF1-Cas9-R and ADH2-Cas9-F/ADH2-pESC-R. The  $\delta$  site specific gRNA expressed cassette with *SNR52* promoter and *SUP4* terminator was amplified from plasmid pUC57-gRNA using primers SNR52p-MSC-pESC-F and SUP4t-MSC-TEF1-R. The purified fragments *gRNA*, *TEF1*, *Cas9*, *ADH2* were joined through OE-PCR using primers SNR52p-MSC-pESC-F and ADH2-pESC-R to generate  $gRNA$ - $P_{TEF1}$ -*Cas9*- $T_{ADH2}$ . Plasmid backbone sequence was amplified from pESC-URA using primers pESC-ADH2-F/pESC-SNR52P-MCS-R. Then fragments  $gRNA$ - $P_{TEF1}$ -*Cas9*- $T_{ADH2}$  and plasmid backbone were joined using the In-Fusion Cloning Kit (Clontech), resulting in Cas9 and gRNA co-expressing plasmid p-Cas9-gRNA, then verified by DNA sequencing.

### 1.2 Gene deletion cassette construction

#### Gene *HXK2* deletion cassette was constructed as follows:

The genome DNA of *S. cerevisiae* YPH499 was used as template to obtain the

---

upstream and downstream sequences of gene *HXK2*, *SER3* and *SOR1*, respectively. The 414 bp *HXK2* upstream sequence was amplified by primers HXK2-1F and HXK2-1R, and 386 bp *HXK2* downstream sequence was amplified by primers HXK2-2F and HXK2-2R. The primers contained about 20 bp homologous sequences on their respective 5' ends to create the overlap regions around the *KanMX* cassette of the pUC6 plasmid. The *KanMX* cassette was amplified using primers Kan-F and Kan-R. The three purified fragments were joined through OE-PCR using primers HXK2-1F and HXK2-2R, and cloned into pEASY-Blunt-Simple, resulting in plasmid pEASY-HXK2, then verified by DNA sequencing.

**Gene *SER3* deletion cassette was constructed as follows:**

The 390 bp *SER3* upstream sequence was amplified by primers SER3-1F and SER3-1R, and 388 bp *SER3* downstream sequence was amplified by primers SER3-2F and SER3-2R. The two purified fragments and *KanMX* cassette were joined through OE-PCR using primers SER3-1F and SER3-2R, and cloned into pEASY-Blunt-Simple, resulting in plasmid pEASY-SER3, then verified by DNA sequencing.

**Gene *SOR1* deletion cassette was constructed as follows:**

The 427 bp *SOR1* upstream sequence was amplified by primers SOR1-1F and SOR1-1R, and 334 bp *SOR1* downstream sequence was amplified by primers SOR1-2F and SOR1-2R. The two purified fragments and *KanMX* cassette were joined through OE-PCR using primers SOR1-1F and SOR1-2R, and cloned into pEASY-Blunt-Simple, resulting in plasmid pEASY-SOR3, then verified by DNA sequencing.

## 2 Supplementary figures

**Fig. S1 The design and construction of integration modules for *S. cerevisiae* transformation**

The DNA integration modules used in this study were designed to be integrated into one of three chromosomal loci in the yeast genome. Blue blocks indicate gene expression cassettes with a promoter, DNA coding sequence, and a terminator. Red blocks indicate the upstream and downstream sequences of chromosomal loci. Gray blocks indicate about 500 bp DNA homologous sequences of the adjacent modules. The genes synthesized according to the codon bias of yeast are labeled in red body. The plasmids constructed in this study are listed in Table S1 and primers used in construction of DNA integration modules are listed in Table S2.

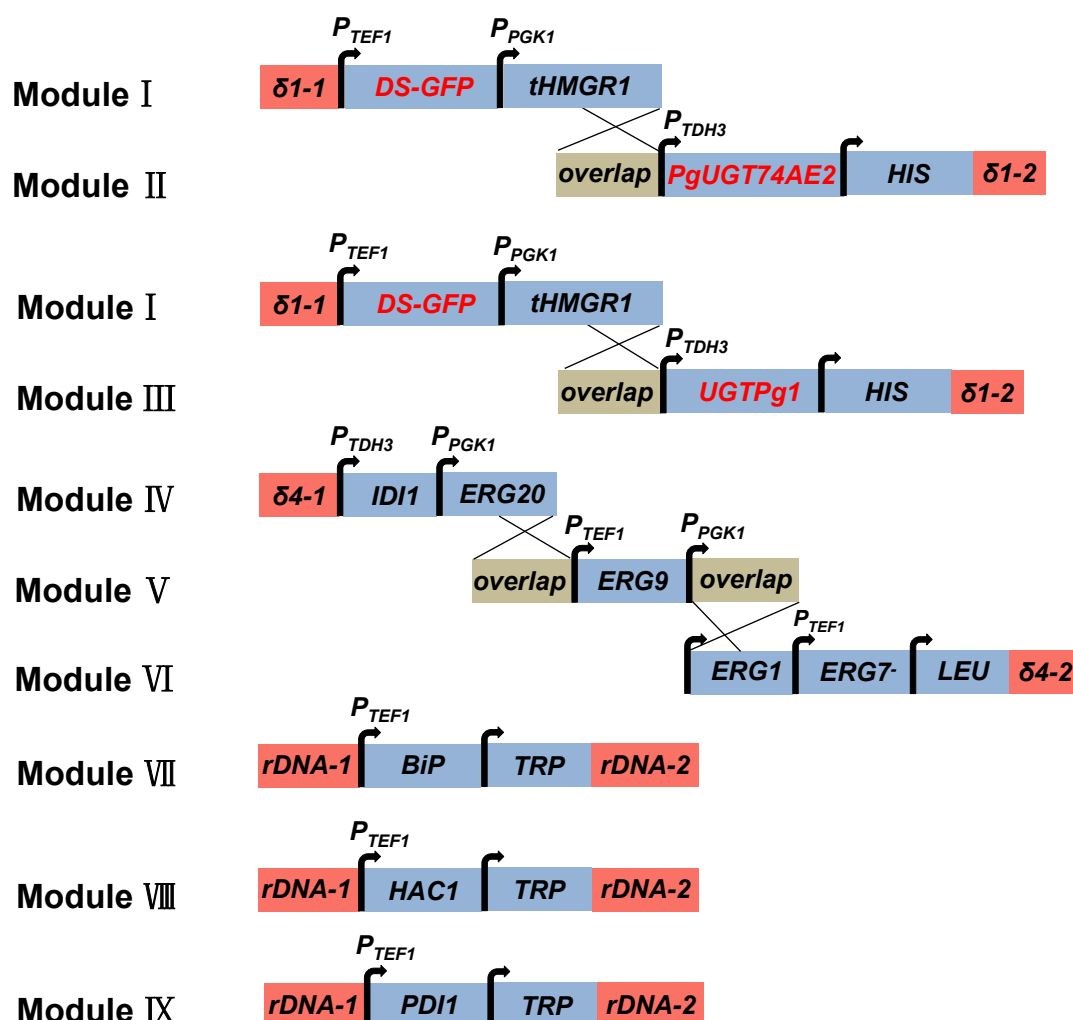

---

**Fig. S2 SDS-PAGE of the cell extracts of *E. coli* recombinants**

1: soluble proteins of pET32a-UGTPg1-transformed *E.coli* BL21 (DE3). 2: soluble proteins of pET32a-PgUGT74AE2-transformed *E.coli* BL21 (DE3). 3: soluble proteins of pET32a-transformed *E.coli* BL21 (DE3).

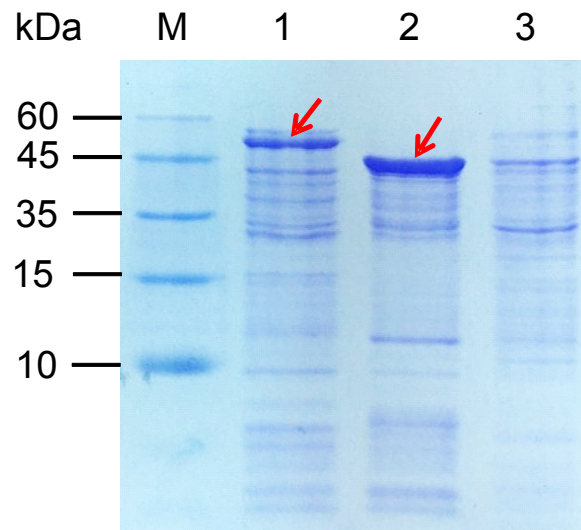

**Fig. S3** The  $^1\text{H}$  NMR (A),  $^{13}\text{C}$  NMR (B), HMBC (C) and HSQC (D) spectra of 3 $\beta$ -*O*-Glc-DM produced by *in vitro* reaction in methanol- $d_4$

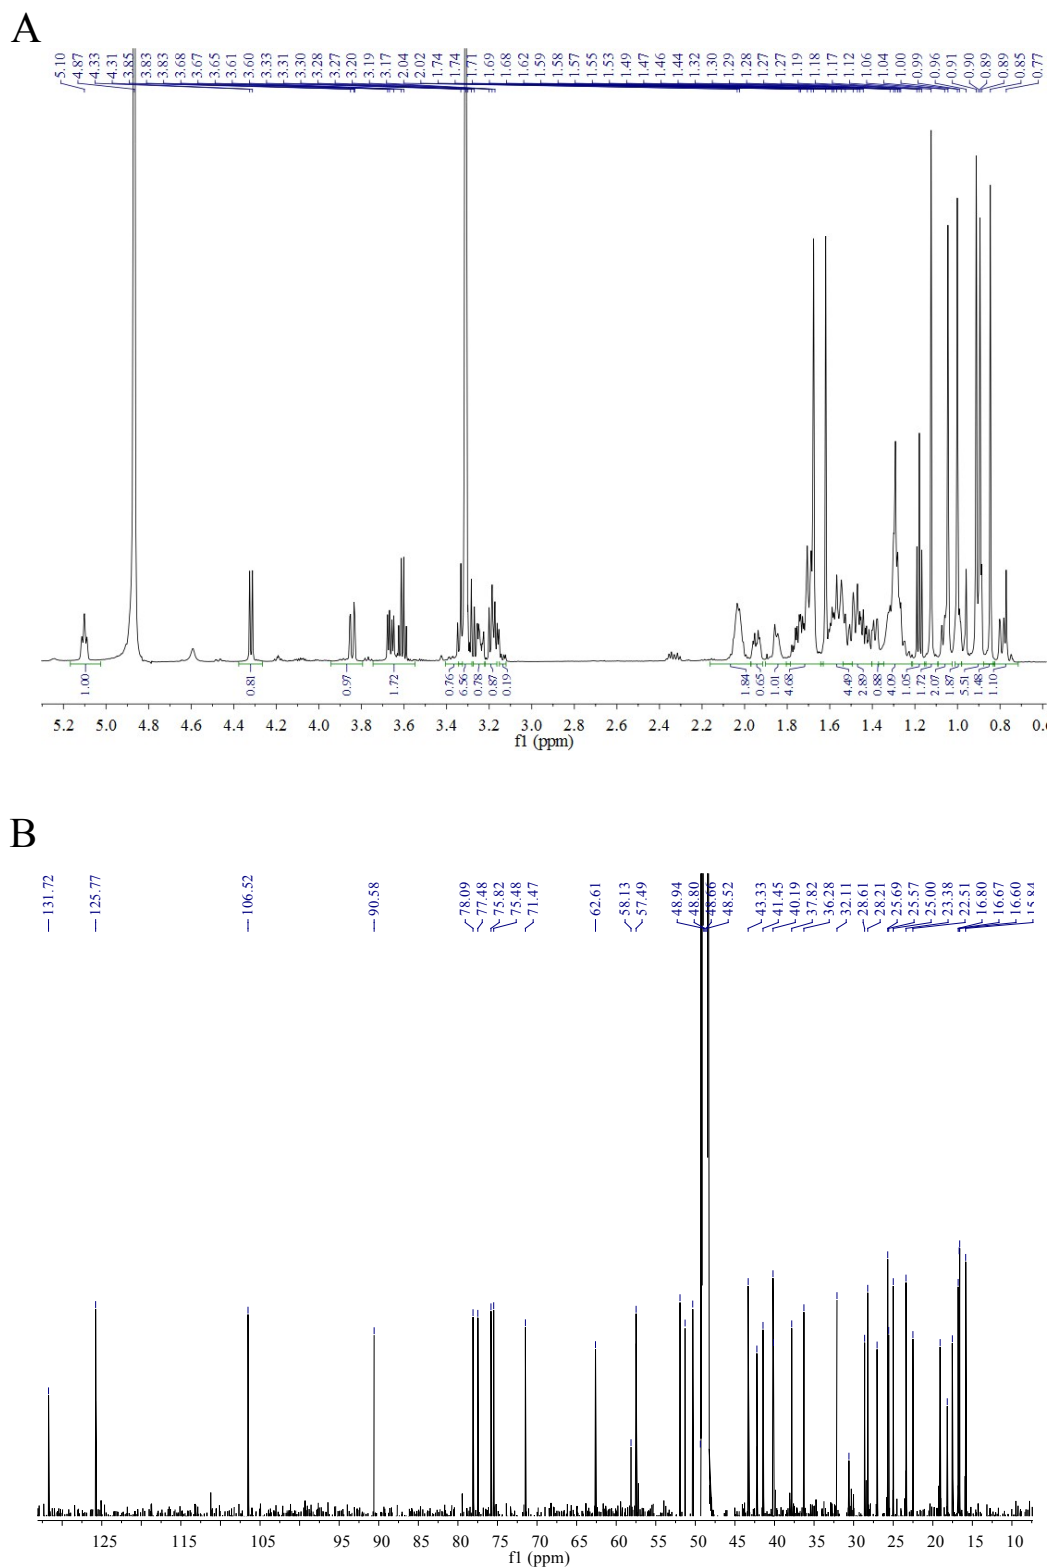

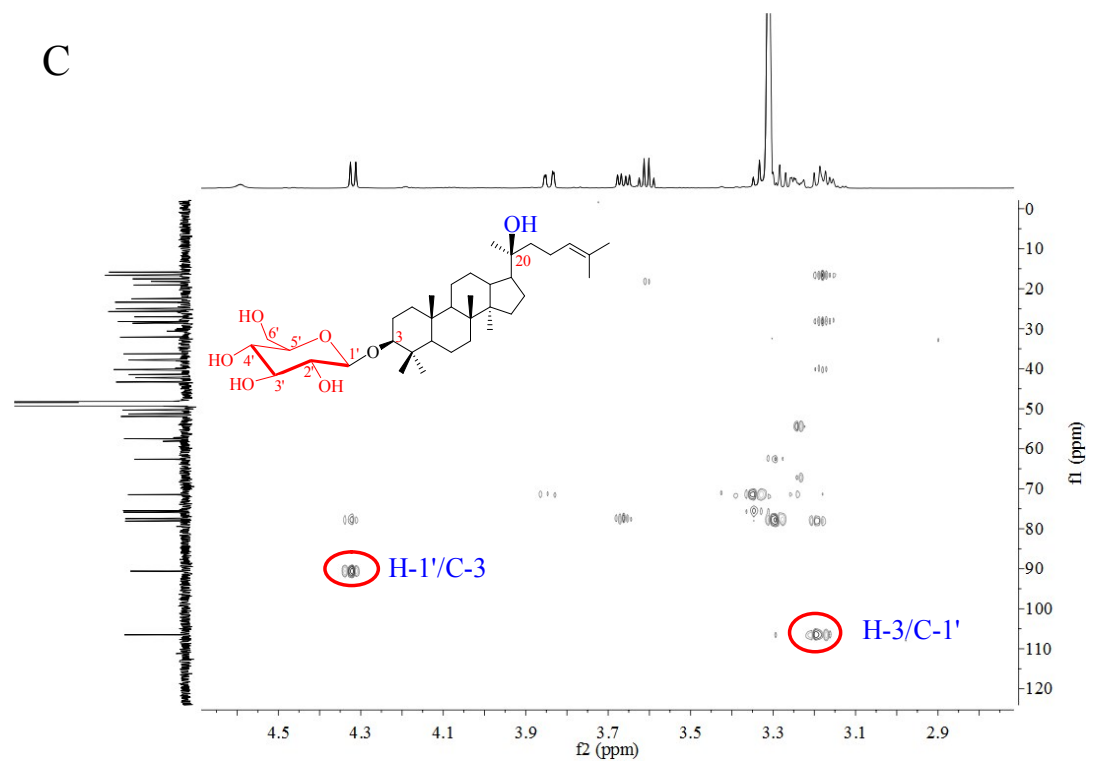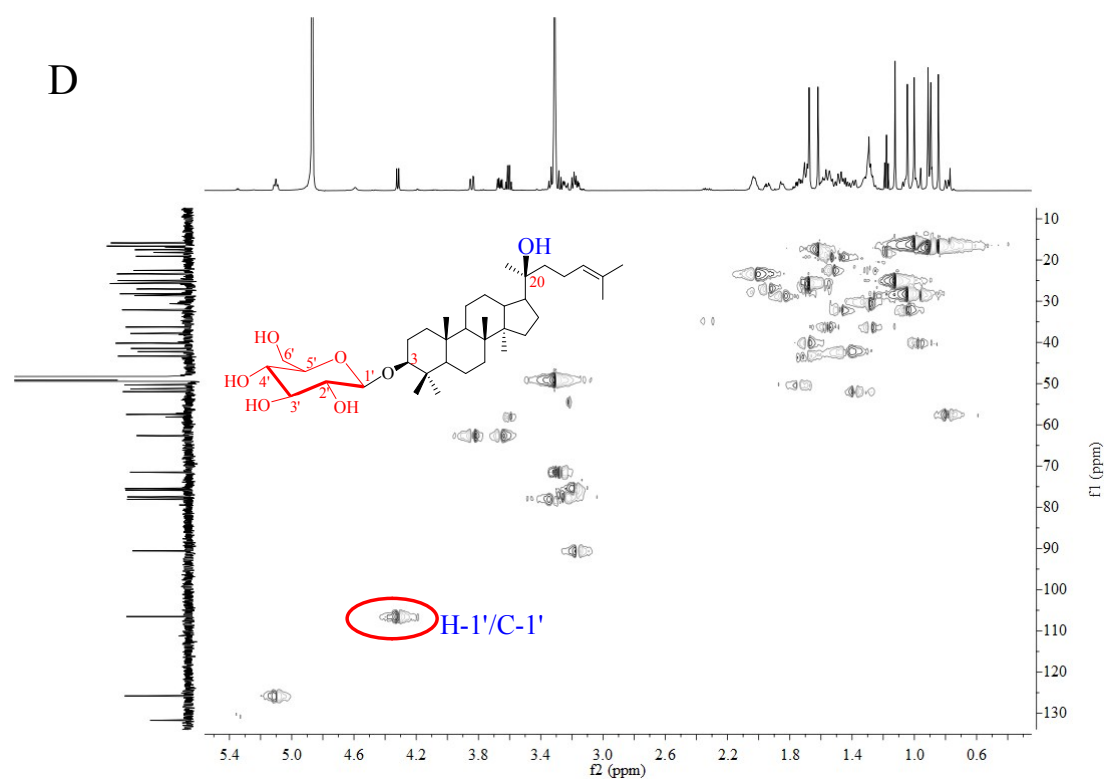

**Fig. S4** The  $^1\text{H}$  NMR (A),  $^{13}\text{C}$  NMR (B), HMBC (C) and HSQC (D) spectra of 20*S*-*O*-Glc-DM produced by *in vitro* reaction in methanol- $d_4$

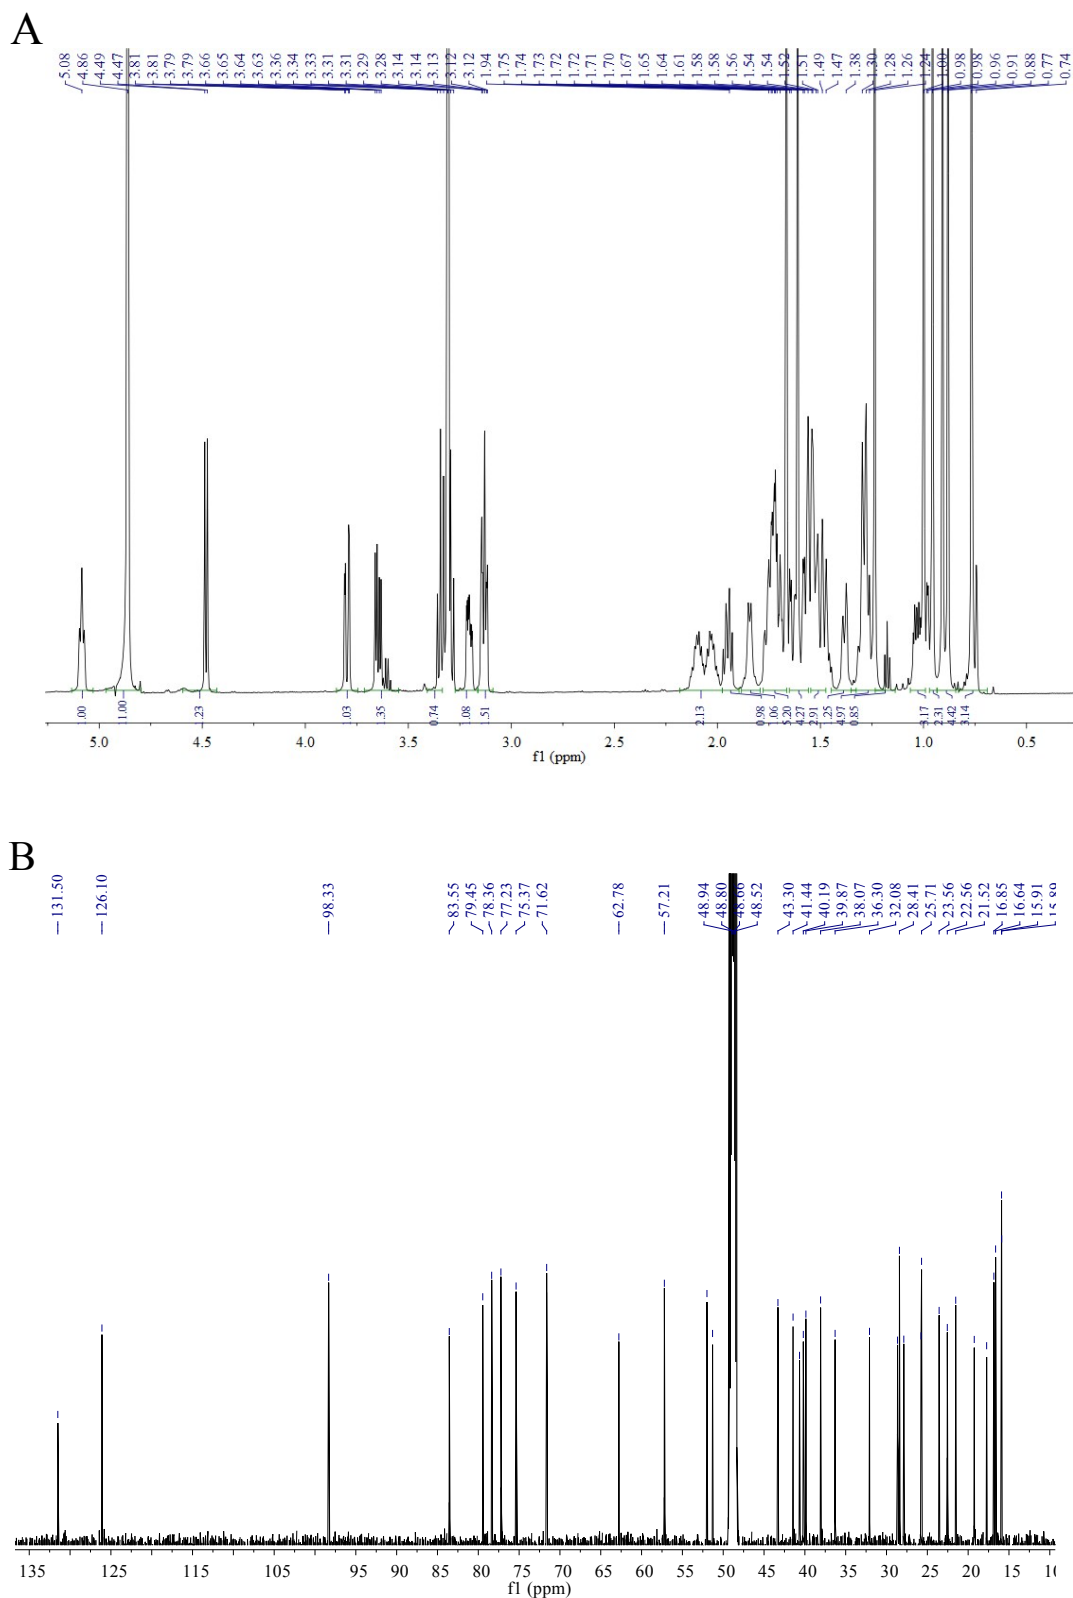

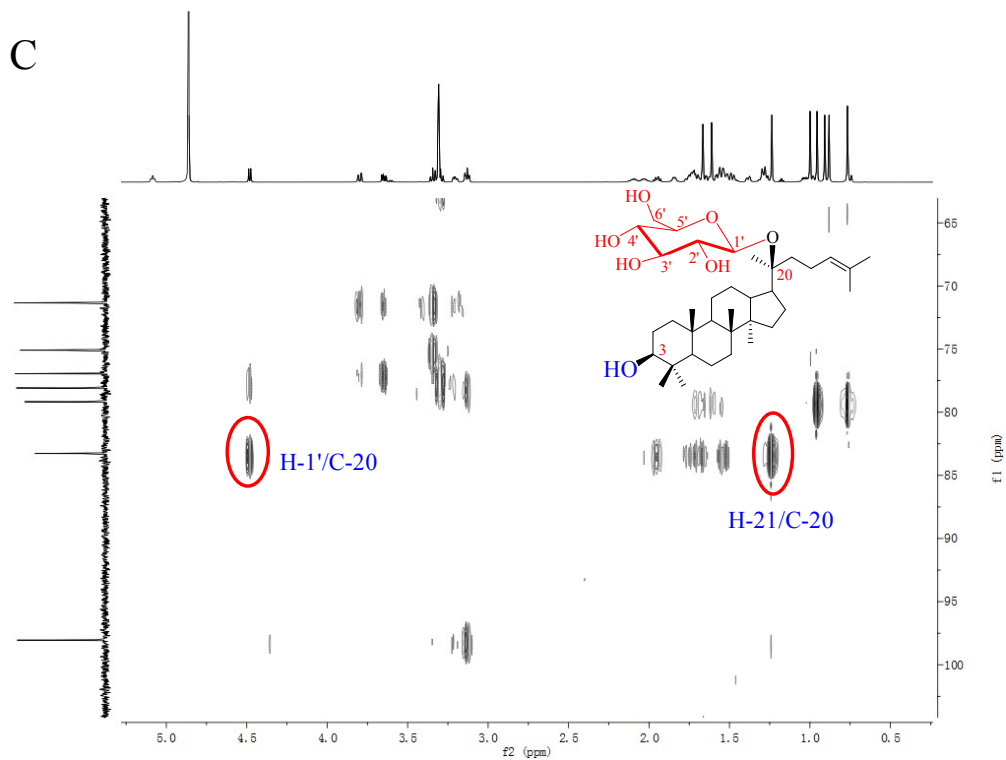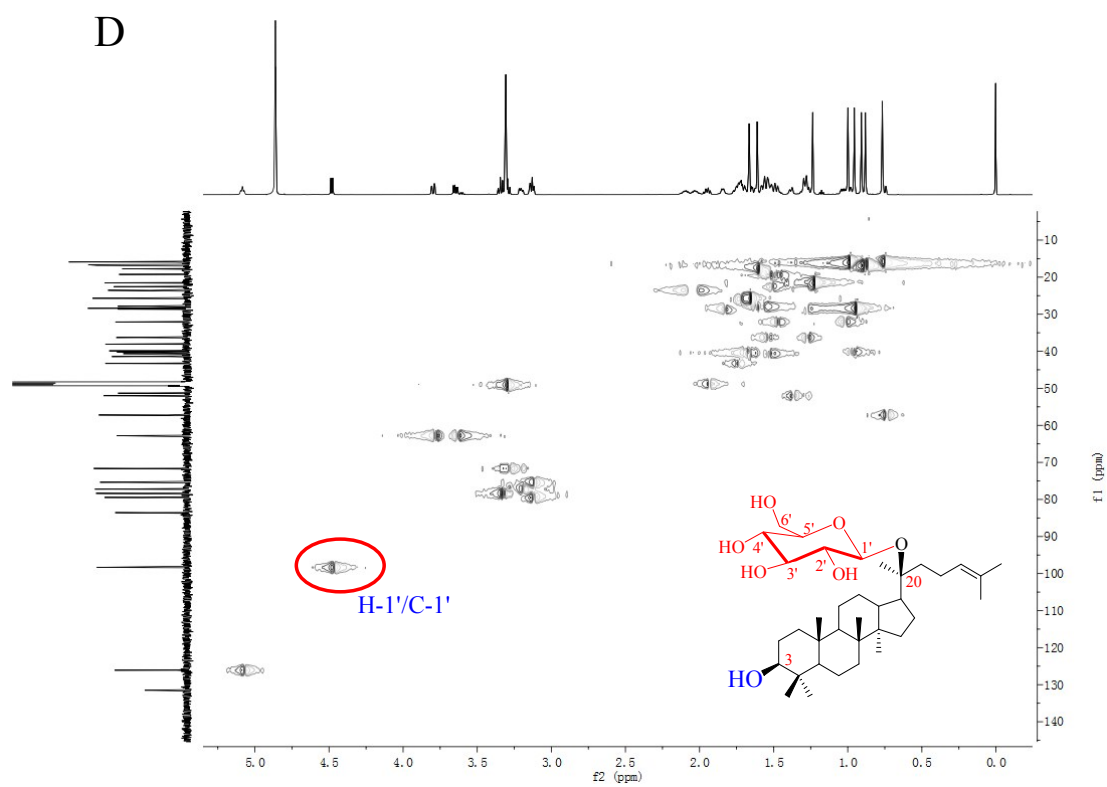



**Fig. S5 The  $^1\text{H}$  NMR (A),  $^{13}\text{C}$  NMR (B), HMBC (C) and HSQC (D) spectra of 3 $\beta$ -*O*-Glc-DM produced by engineered yeast in methanol- $d_4$**

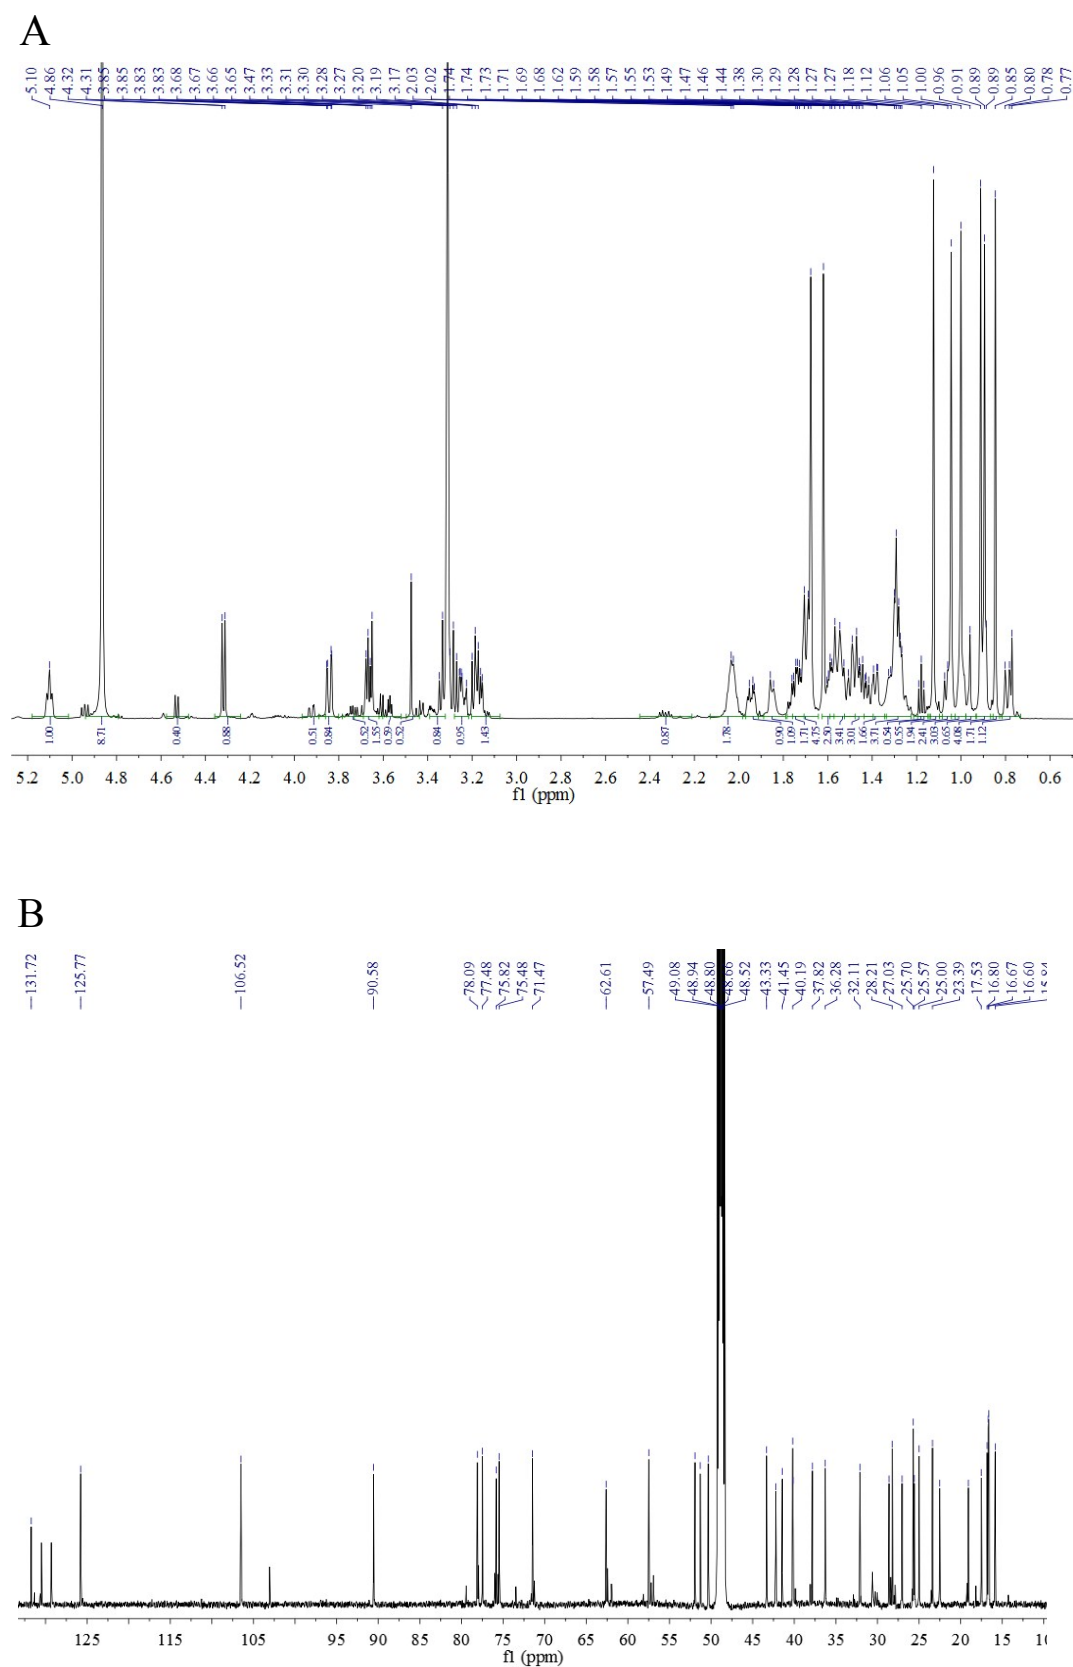

C

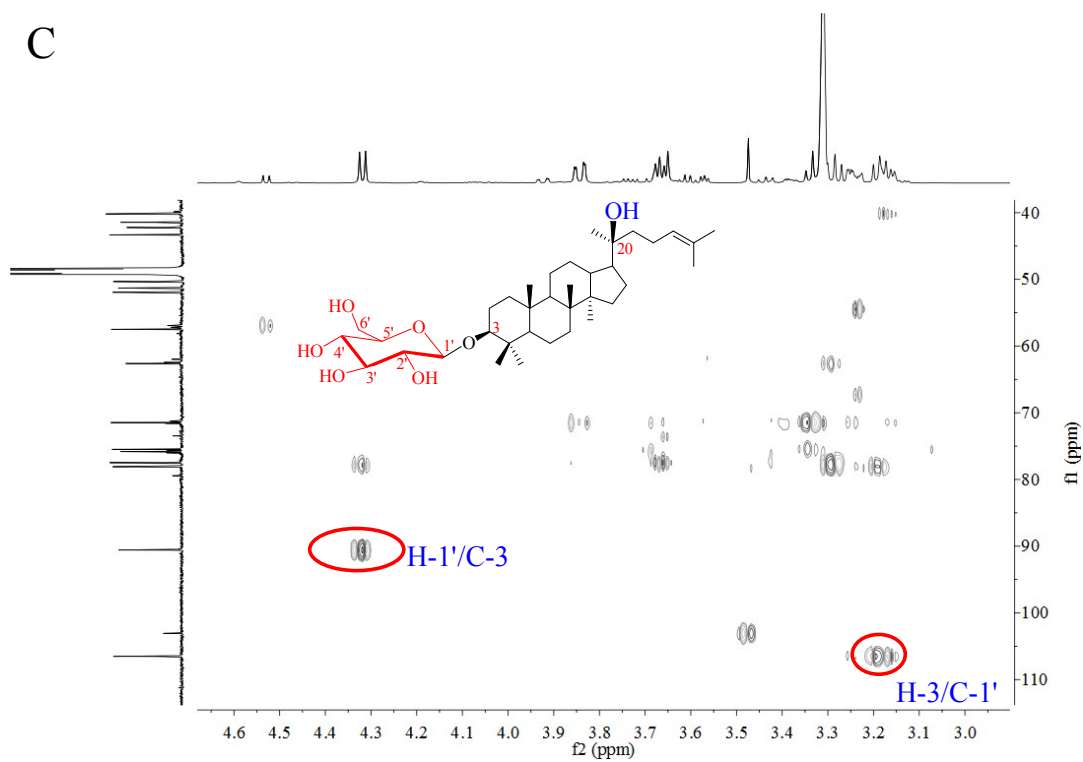

D

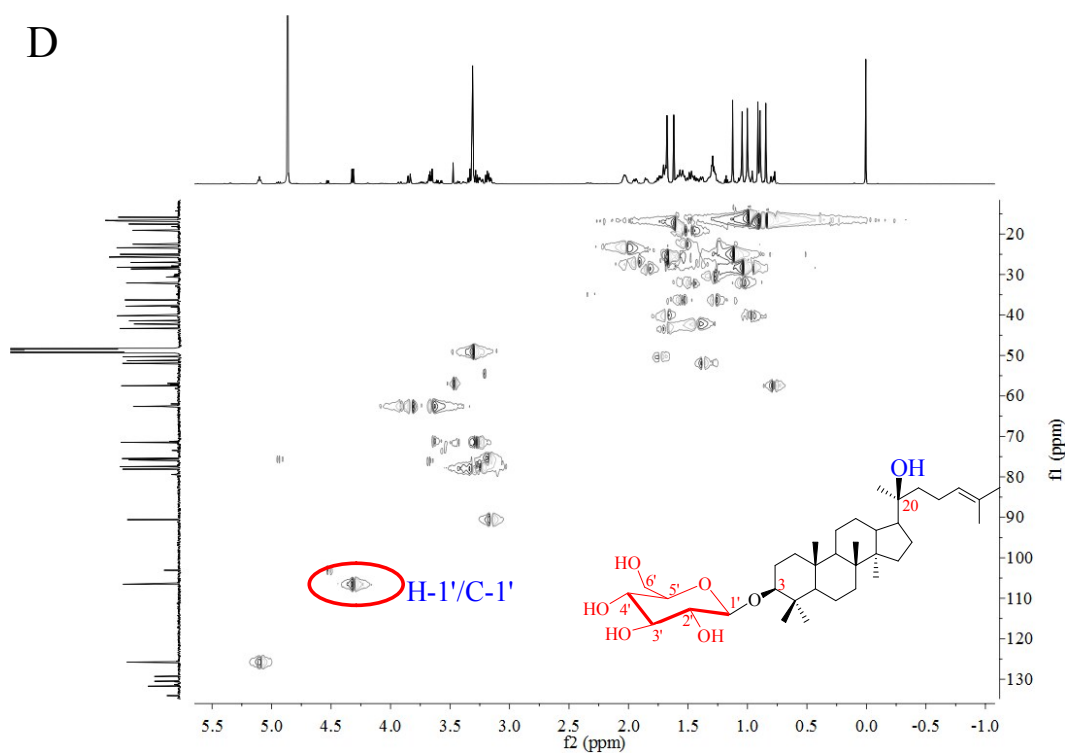

**Fig. S6 The  $^1\text{H}$  NMR (A),  $^{13}\text{C}$  NMR (B), HMBC (C) and HSQC (D) spectra of 20*S*-*O*-Glc-DM produced by engineered yeast in methanol- $d_4$**

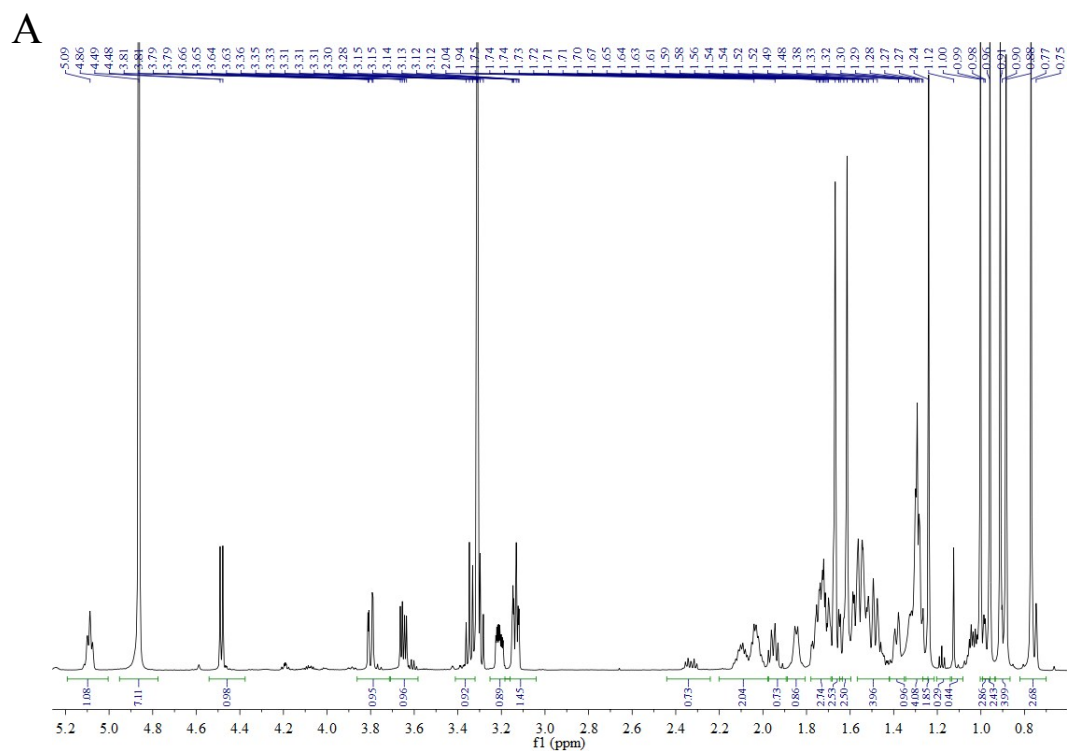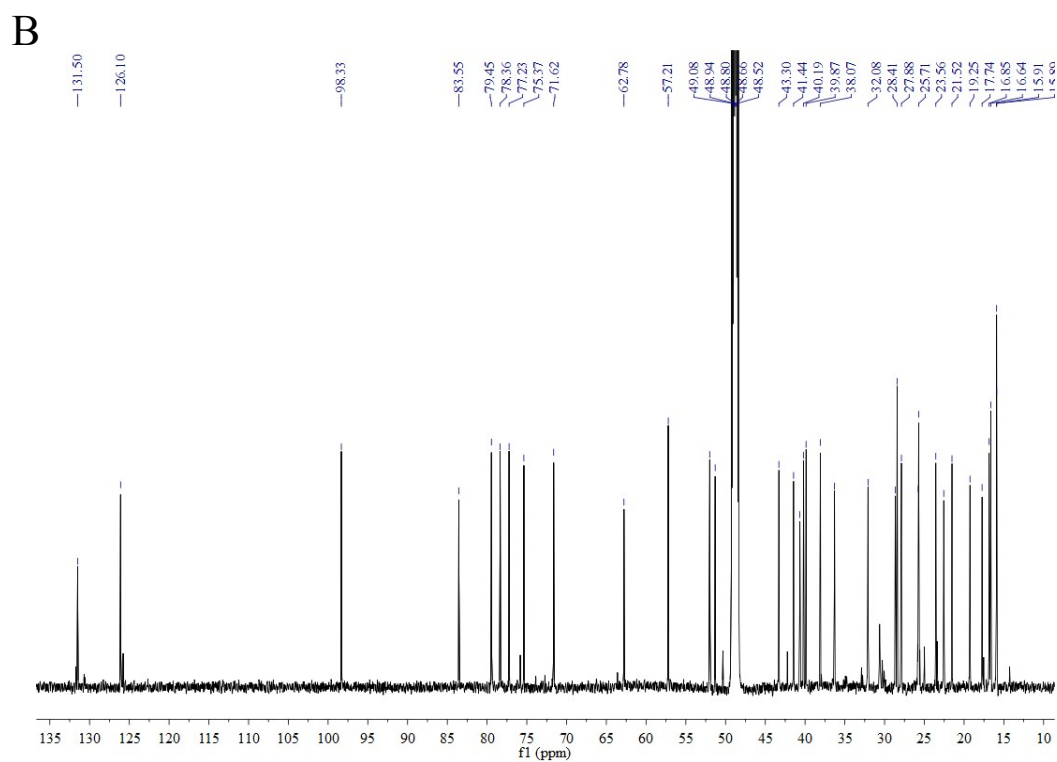

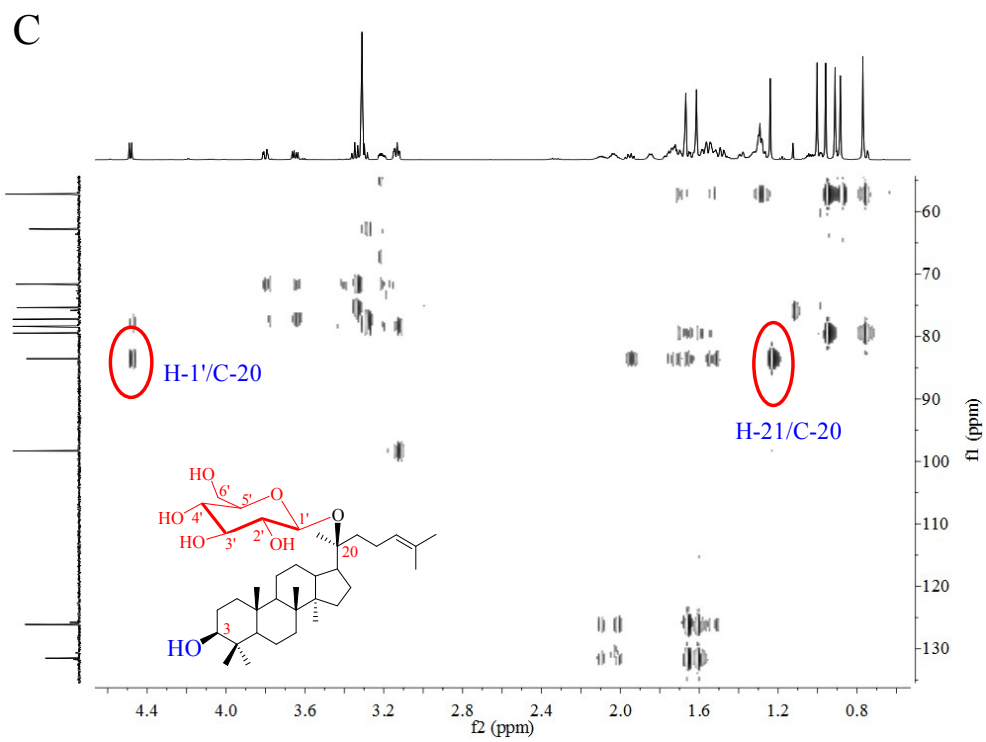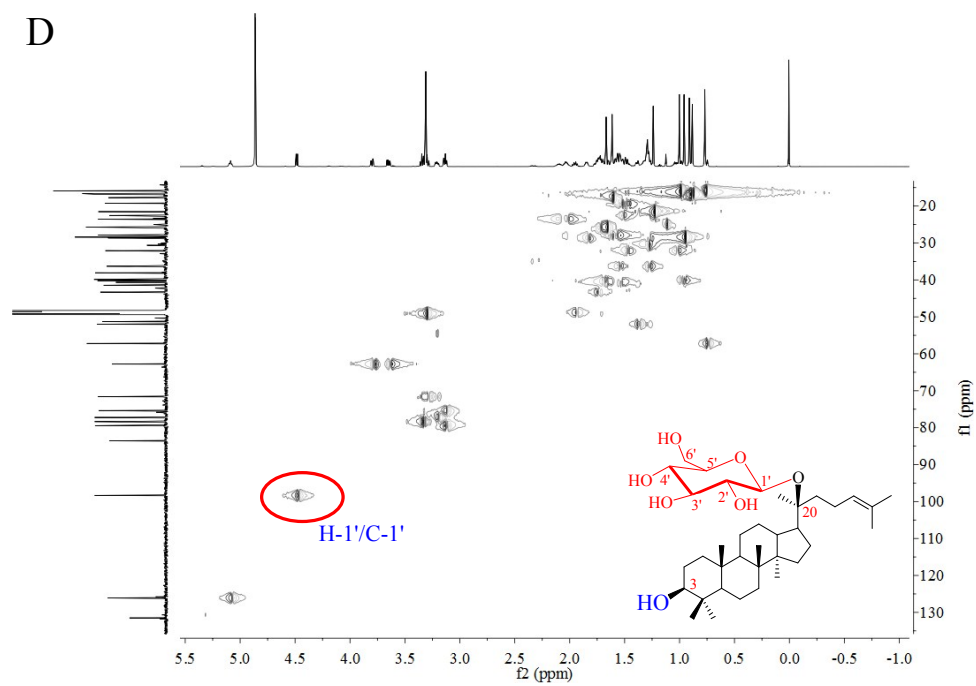

---

**Fig. S7 Screening of yeast strains Y1C and Y2C**

Comparisons of 3 $\beta$ -*O*-Glc-DM and 20*S*-*O*-Glc-DM titers of different yeast transformants after being cultured in YPD for 3 days. (A) Genotype of Y1C. (B) 3 $\beta$ -*O*-Glc-DM titers of the transformants Y1C-1 to Y1C-20. (C) Genotype of Y2C. (D) 20*S*-*O*-Glc-DM titers of the transformants Y2C-1 to Y2C-20. The highest titers are labeled in red.

**A** Y1C:  
Y- $\Delta$ HXK2 + CRISPR/Cas9 + Module I + Module II

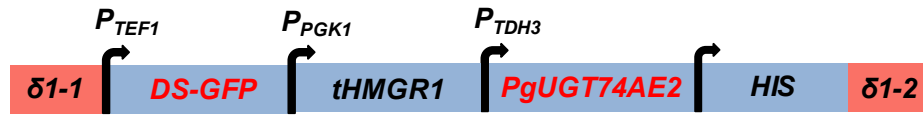

**B**

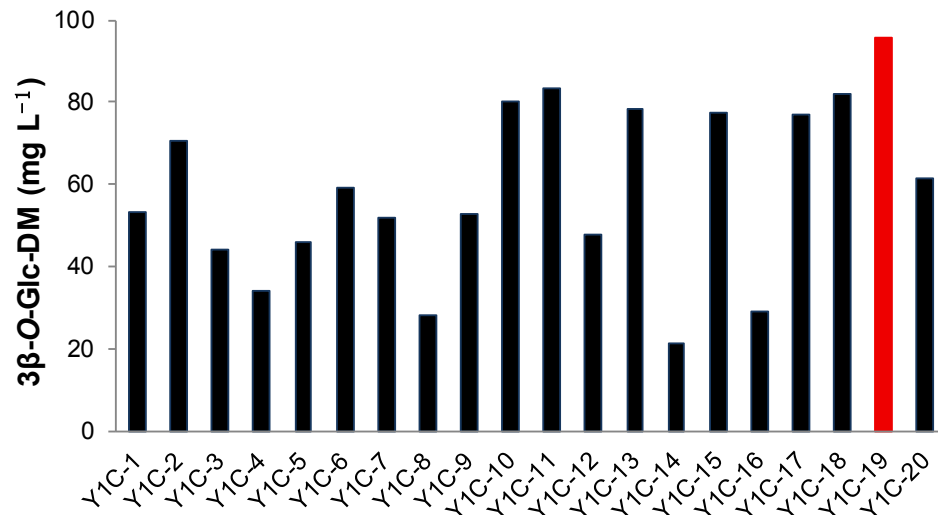

**C** Y2C:  
Y- $\Delta$ HXK2 + CRISPR/Cas9 + Module I + Module III

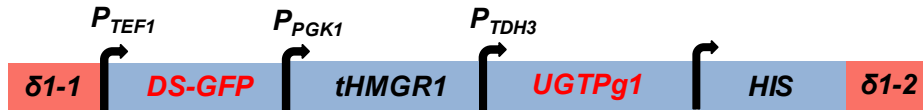

**D**

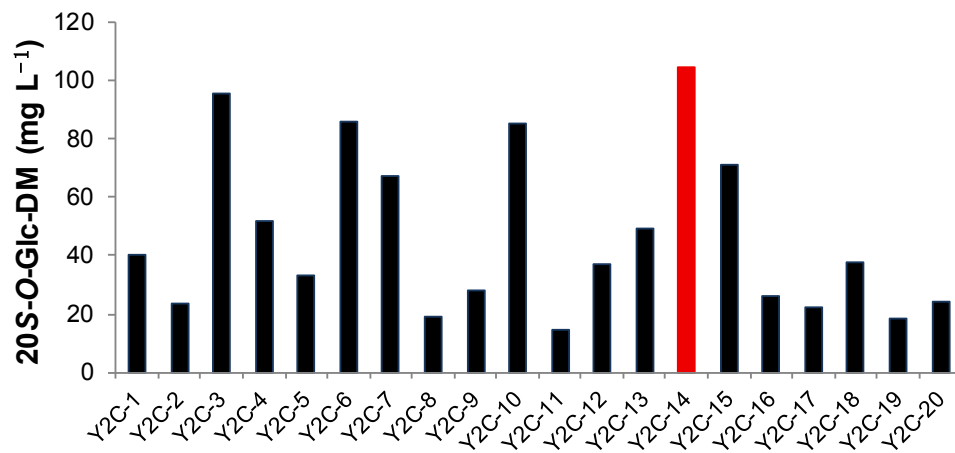

## Fig. S8 Screening of yeast strains Y1CS and Y2CS

Comparisons of 3 $\beta$ -O-Glc-DM and 20S-O-Glc-DM titers of different yeast transformants after being cultured in YPD for 3 days. (A) Genotype of Y1CS. (B) 3 $\beta$ -O-Glc-DM titers of the transformants Y1CS-1 to Y1CS-20. (C) Genotype of Y2CS. (D) 20S-O-Glc-DM titers of the transformants Y2CS-1 to Y2CS-20. The highest titers are labeled in red and the titers of the controls Y1C-19 and Y2C-14 (see Fig. S7) are labeled in blue.

### A Y1CS:

Y1C + Module IV + Module V + Module VI

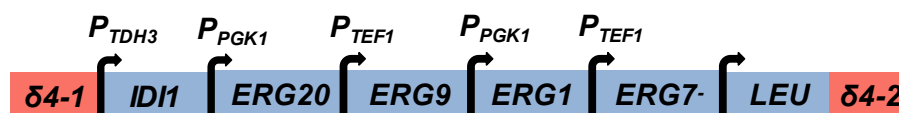

### B

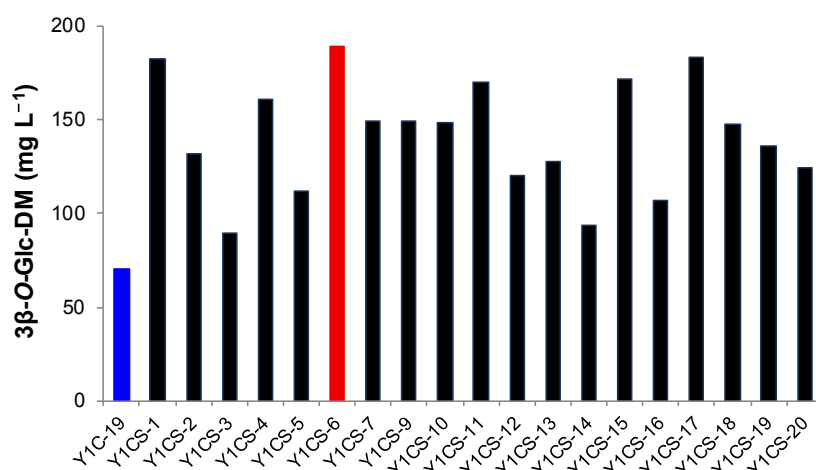

### C

Y2CS:

Y2C + Module IV + Module V + Module VI

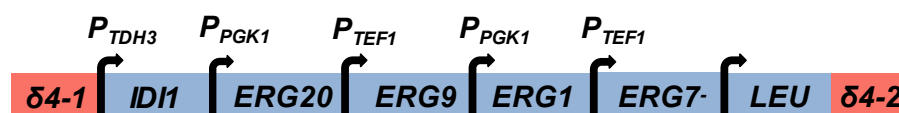

### D

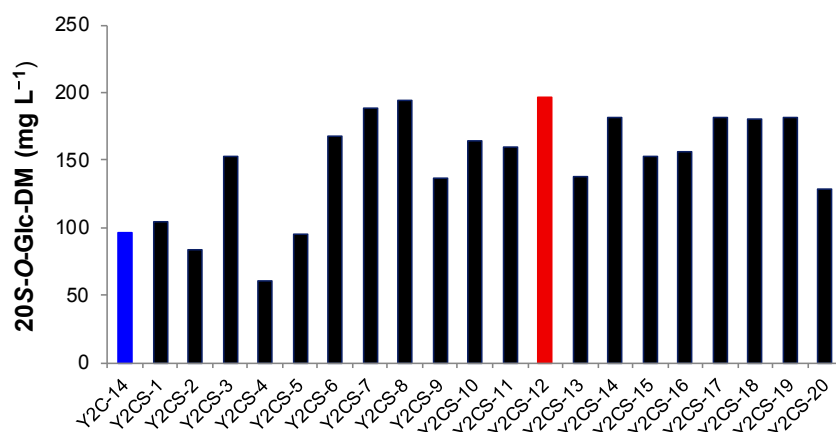

---

**Fig. S9 Screening of yeast strains Y1CSB, Y1CSH, Y1CSP and Y2CSB, Y2CSH, Y2CSP**

Comparisons of 3 $\beta$ -*O*-Glc-DM and 20*S*-*O*-Glc-DM titers of different yeast transformants after being cultured in YPD for 3 days. (A) Genotype of Y1CSB, Y1CSH, Y1CSP. (B) 3 $\beta$ -*O*-Glc-DM titers of the transformants Y1CSB-1 to Y1CB-10 are labeled in blue; 3 $\beta$ -*O*-Glc-DM titers of the transformants Y1CSH-1 to Y1CSH-10 are labeled in orange; 3 $\beta$ -*O*-Glc-DM titers of the transformants Y1CSP-1 to Y1CSP-10 are labeled in green and 3 $\beta$ -*O*-Glc-DM titer of the control Y1CS-6 (see Fig. S8) is labeled in gray. (C) Genotype of Y2CSB, Y2CSH, Y2CSP. (D) 20*S*-*O*-Glc-DM titers of the transformants Y2CSB, Y2CSH and Y2CSP. 20*S*-*O*-Glc-DM titers of the transformants Y2CSB-1 to Y2CB-10 are labeled in blue; 20*S*-*O*-Glc-DM titers of the transformants Y2CSH-1 to Y2CSH-10 are labeled in orange; 20*S*-*O*-Glc-DM titers of the transformants Y2CSP-1 to Y2CSP-10 are labeled in green and 20*S*-*O*-Glc-DM titer of the control Y2CS-12 (see Fig. S8) is labeled in gray. The highest titers are pointed out by black arrows.



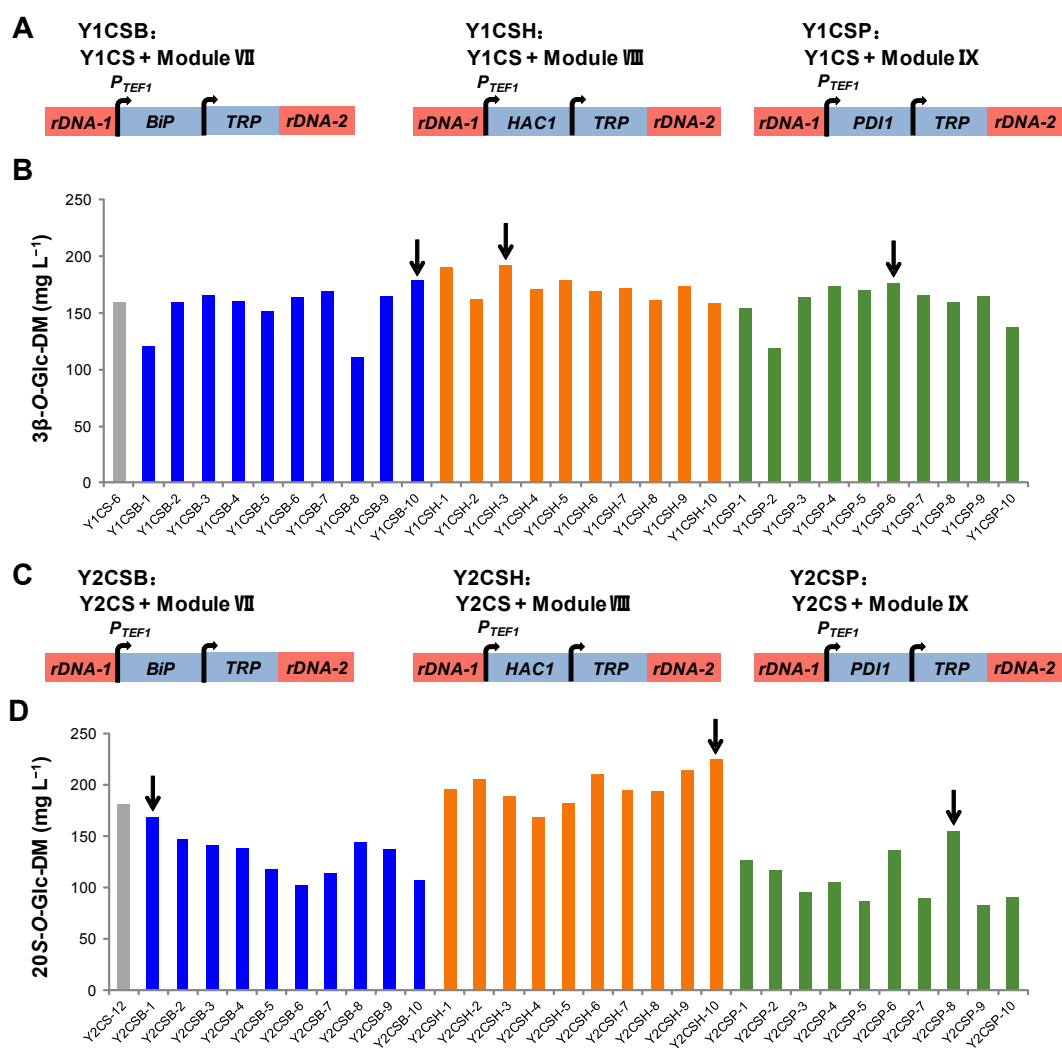

### 3 Supplementary tables

**Table S1 Plasmids used in this study**

| Name               | Description                                                                                   | Source             |
|--------------------|-----------------------------------------------------------------------------------------------|--------------------|
| pEASY-Blunt        | Cloning vector for blunt ligation, Amp <sup>r</sup> , Kan <sup>r</sup>                        | TransGen Biotech   |
| pEASY-Blunt Zero   | Cloning vector for blunt ligation, Amp <sup>r</sup> , Kan <sup>r</sup>                        | TransGen Biotech   |
| pEASY-Blunt Simple | Cloning vector for blunt ligation, Amp <sup>r</sup> , Kan <sup>r</sup>                        | TransGen Biotech   |
| pESC-HIS-DS-GFP    | $2\mu$ , <i>pGAL1-DS-GFP</i> , <i>HIS3</i>                                                    | Liang et al., 2017 |
| pESC-URA           | $2\mu$ , <i>URA3</i>                                                                          | (Invitrogen, USA)  |
| pESC-TRP           | $2\mu$ , <i>TRP1</i>                                                                          | (Invitrogen, USA)  |
| pESC-LEU           | $2\mu$ , <i>LEU2</i>                                                                          | (Invitrogen, USA)  |
| pESC-URA-ERG7      | $2\mu$ , <i>ERG7</i> antisense fragment, <i>URA3</i>                                          | Wang et al., 2015b |
| pUC57-PgUGT74AE2   | Cloning codon-optimized <i>PgUGT74AE2</i> into pUC57                                          | Tianjin University |
| pUC57-UGTPg1       | Cloning codon-optimized <i>UGTPg1</i> into pUC57                                              | Tianjin University |
| pET-UGTPg1         | Cloning <i>UGTPg1</i> gene into pET-32a                                                       | This study         |
| pET-PgUGT74AE2     | Cloning <i>PgUGT74AE2</i> gene into pET-32a                                                   | This study         |
| FM-1               | Cas9 expressing plasmid                                                                       | Zhang et al., 2016 |
| pEASY-HXK2         | Cloning <i>HXK2</i> gene deletion cassette into pEASY-Blunt Simple                            | This study         |
| pEASY-SER3         | Cloning <i>SER3</i> gene deletion cassette into pEASY-Blunt Simple                            | This study         |
| pEASY-SOR1         | Cloning <i>SOR1</i> gene deletion cassette into pEASY-Blunt Simple                            | This study         |
| pEASY-IN $\delta$  | Cloning $\delta I$ site into pEASY-Blunt Simple                                               | This study         |
| pEASY-TY4          | Cloning $\delta 4$ site into pEASY-Blunt Simple                                               | This study         |
| pEASY-rDNA         | Cloning <i>rDNA</i> site into pEASY-Blunt Simple                                              | This study         |
| pEASY-DS-GFP       | Cloning <i>P<sub>TEF1</sub>-synDS-GFP-T<sub>CYC1</sub></i> cassette into pEASY-Blunt Zero     | This study         |
| pEASY-tHMGR        | Cloning <i>P<sub>PGK1</sub>-tHMGR-T<sub>ADH1</sub></i> cassette into pEASY-Blunt Zero         | This study         |
| pEASY-UGTPg1       | Cloning <i>P<sub>TDH3</sub>-synUGTPg1-T<sub>ADH2</sub></i> cassette into pEASY-Blunt Zero     | This study         |
| pEASY-PgUGT74AE2   | Cloning <i>P<sub>TDH3</sub>-synPgUGT74AE2-T<sub>ADH2</sub></i> cassette into pEASY-Blunt Zero | This study         |
| pEASY-BiP          | Cloning <i>P<sub>TEF1</sub>-BiP-T<sub>CYC1</sub></i> cassette into pEASY-Blunt Zero           | This study         |
| pEASY-HAC1         | Cloning <i>P<sub>TEF1</sub>-HAC1-T<sub>CYC1</sub></i> cassette into pEASY-Blunt Zero          | This study         |

---

|             |                                                                                                                            |            |
|-------------|----------------------------------------------------------------------------------------------------------------------------|------------|
| pEASY-PDI1  | Cloning $P_{TEF1}$ - $PD11$ - $T_{CYC1}$ cassette into pEASY-Blunt Zero                                                    | This study |
| pEASY-ID11  | Cloning $P_{TDH3}$ - $ID11$ - $T_{TPI1}$ cassette into pEASY-Blunt Zero                                                    | This study |
| pEASY-ERG20 | Cloning $P_{PGK1}$ - $ERG20$ - $T_{ADH1}$ cassette into pEASY-Blunt Zero                                                   | This study |
| pEASY-ERG9  | Cloning $P_{TEF1}$ - $ERG9$ - $T_{CYC1}$ cassette into pEASY-Blunt Zero                                                    | This study |
| pEASY-ERG1  | Cloning $P_{PGK1}$ - $ERG1$ - $T_{ADH1}$ cassette into pEASY-Blunt Zero                                                    | This study |
| pEASY-ERG7  | Cloning $P_{TEF1}$ - $ERG7$ - $T_{CYC1}$ cassette into pEASY-Blunt Zero                                                    | This study |
| pEASY-1     | Cloning $overlap$ - $P_{TDH3}$ - $synPgUGT74AE2$ - $T_{ADH2}$ - $HIS$ - $\delta 1$ -2 into pEASY-Blunt Zero                | This study |
| pEASY-2     | Cloning $overlap$ - $P_{TDH3}$ - $synUGTPg1$ - $T_{ADH2}$ - $HIS$ - $\delta 1$ -2 into pEASY-Blunt Zero                    | This study |
| pEASY-3     | Cloning $\delta 1$ -1- $P_{TEF1}$ - $synDS$ - $GFP$ - $T_{CYC1}$ - $P_{PGK1}$ - $tHMG1$ - $T_{ADH1}$ into pEASY-Blunt Zero | This study |
| pEASY-S28   | Cloning $\delta 4$ -1- $P_{TDH3}$ - $ID11$ - $T_{TPI1}$ - $P_{PGK1}$ - $ERG20$ - $T_{ADH1}$ into pEASY-Blunt               | This study |
| pEASY-S813  | Cloning $overlap$ - $P_{TEF1}$ - $ERG9$ - $T_{CYC1}$ - $overlap$ into pEASY-Blunt                                          | This study |
| pEASY-S1319 | Cloning $P_{PGK1}$ - $ERG1$ - $T_{ADH1}$ - $P_{TEF1}$ - $ERG7$ - $T_{CYC1}$ - $LEU$ - $\delta 4$ -2 into pEASY-Blunt       | This study |
| p-Cas9-gRNA | Cas9 and gRNA co-expressing plasmid, URA3                                                                                  | This study |
| p-TRP-rDNA  | Scaffold plasmid with $rDNA$ , $TRP$ marker gene and multiple cloning sites                                                | This study |
| p-TRP-BiP   | Cloning $P_{TEF1}$ - $BiP$ - $T_{CYC1}$ cassette into p-TRP-rDNA                                                           | This study |
| p-TRP-HAC1  | Cloning $P_{TEF1}$ - $HAC1$ - $T_{CYC1}$ cassette into p-TRP-rDNA                                                          | This study |
| p-TRP-PDI1  | Cloning $P_{TEF1}$ - $PD11$ - $T_{CYC1}$ cassette into p-TRP-rDNA                                                          | This study |

---

**Table S2 Primers used for construction of plasmids and genome integration modules**

| Primer          | Sequence (5' to 3')                                          |
|-----------------|--------------------------------------------------------------|
| UGTPg1-F        | CGGGATCCCGATGAAGTCCGAATTAATTTTC                              |
| UGTPg1-R        | GCGTCGACGTCTTGGCCATAGTTACATAATCTCCTCAAATAATTTG               |
| UGT74AE2-F      | CGGGATCCCGATGTTGTCCAAGACTCACATC                              |
| UGT74AE2-R      | GCGTCGACGTCTTGGCCATAGTTAGGAGGAACTAGCTTGG                     |
| Delta1-2F       | GGAAGCTGAAACGTCTAACGGATC                                     |
| Delta1-TEF1-1R  | GGTGTGTGGGGGATCACTGAGAAGTTCTAGTATATTCTGTATACCTAATATT<br>ATAG |
| A-TEF1-Delta1-F | CTATAATATTAGGTATACAGAATATACTAGAAGTTCTCAGTGATCCCCCACA<br>CACC |
| TEF1-DS-R       | GGGCTACCTTTAGCTTCCACATTTTTGTAAATAAACTTAGATTAGA               |
| DS-TEF1-F       | TCTAATCTAAGTTTTAATTACAAAAATGTGGAAGCTAAAGGTAGCCC              |
| DS-CYC1-R       | CCTTCCTTTTCGGTTAGAGCGGATTTACTTGTACAGCTCGTCCATGCCG            |
| CYC1-DS-F       | CGGCATGGACGAGCTGTACAAGTAAATCCGCTCTAACCGAAAAGGAAGG            |
| CYC1-PGK1-R     | GCAGATGTTATAATATCTGTGCGTCGAGCGTCCCAAACCTTCTC                 |
| PGK1-CYC1-F     | GAGAAGGTTTTGGGACGCTCGACGCACAGATATTATAACATCTGC                |
| PGK1-tHMG1-R    | CTTCAGTTTTCACCAATTGGTCCATTTTTGTTTTATTTGTTGTAAAAAGTA          |
| tHMG1-PGK1-F    | TACTTTTTACAACAAATATAAAACAAAAATGGACCAATTGGTGAAAAGTGA<br>AG    |
| tHMG1-ADH1-R    | GTATACACTTATTTTTTTTATAACTCACATGGTGCTGTTGTGCTTC               |
| ADH1-tHMG1-F    | GAAGCACAACAGCACCATGTGAGTTATAAAAAAATAAGTGTATAC                |
| ADH1-R          | TCGGCATGCCGGTAGAGGTGTGGTC                                    |
| B400-F          | TACCGCTCCTGGTACCAAC                                          |
| ADH1-TDH3-R     | GACGCTAACATTCAACGCTAGTATTACCGTTATCTCCCTTATACTTCTC            |
| TDH3-ADH1-F     | GAGAAGTATAAGGGAGATAACGGTAAATACTAGCGTTGAATGTTAGCGTC           |

---

---

|                 |                                                            |
|-----------------|------------------------------------------------------------|
| TDH3-UGTPg1-R   | GGCAAGAAAATTAATTCGGACTTCATTTTGTGTTGTTTATGTGTGTTTATTTCG     |
| UGTPg1-TDH3-F   | CGAATAAACACACATAAAACAAACAAAAATGAAGTCCGAATTAATTTTCTTG<br>CC |
| UGTPg1-ADH2-R   | AAGACATAAGAGATCCGCTTACATAATCTCCTCAAATAATTTGGC              |
| ADH2-UGTPg1-F   | GCCAAATTATTTGAGGAGATTATGTAAGCGGATCTCTTATGTCTT              |
| ADH2-HIS-R      | GTCATCACCGAAACGCGCATTTACCGTTATCTCCCTTATAC                  |
| HIS-ADH2-F      | GTATAAGGGAGATAACGGTAAATGCGCGTTTCGGTGATGAC                  |
| HIS-Delta2-R    | TTTGAGGATTCTATATCCTCGAGGTGTCACCTACATAAGAACACCT             |
| Delta2-HIS-2F   | AGGTGTTCTTATGTAGTGACACCTCGAGGATATAGGAATCCTCAA              |
| Delta2-1R       | TGTTGGAATAGAAATCAACTATCATC                                 |
| UGT74AE2-TDH3-F | CGAATAAACACACATAAAACAAACAAAAATGTTGTCCAAGACTCACATCATG       |
| UGT74AE2-ADH2-R | CAAAACAAATAAAACATCATCACAAAAATGGCAGCAGCAATGGTGTTG           |
| TDH3-UGT74AE2-R | CATGATGTGAGTCTTGGACAACATTTTGTGTTGTTTATGTGTGTTTATTTCG       |
| ADH2-UGT74AE2-F | CCAAGCTAGTTTCCTCCTAAGCGGATCTCTTATGTCTT                     |

---

|              |                                             |
|--------------|---------------------------------------------|
| TY4-F1       | TGTTGGAACGAGAGTAAT                          |
| TY4-1-TDH3-R | CTAACATTCAACGCTAGTATTATGTACCTACCATAACATG    |
| TDH3-TY4-1-F | CATGTTATGGTAGGTACATAATACTAGCGTTGAATGTTAG    |
| TDH3-IDI1-R  | CTATTGTTGTGCGCAGTCATTTTGTGTTGTTTATGTGTG     |
| IDI1-TDH3-F  | CACACATAAAACAAACAAAATGACTGCCGACAACAATAG     |
| IDI1-TPI1-R  | TTTTATATAATTATATTAATCTTATAGCATTCTATGAATTTG  |
| TPI1-IDI1-F  | CAAATTCATAGAATGCTATAAGATTAATATAATTATATAAAA  |
| TPI1-PGK1-R  | GATGTTATAATATCTGTGCGTCTATATAACAGTTGAAATTTG  |
| PGK1-TPI1-F  | CAAATTTCAACTGTTATATAGACGCACAGATATTATAACATC  |
| PGK1-ERG20-R | CCTAATTTCTTTTCTGAAGCCATTGTTTATATTGTTGTAA    |
| ERG20-PGK1-F | TTACAACAAATATAAAACAATGGCTTCAGAAAAAGAAATTAGG |

---

---

|              |                                               |
|--------------|-----------------------------------------------|
| ERG20-ADH1-R | ACTTATTTTTTTTATAACTCTATTTGCTTCTCTTGTA AAC     |
| ADH1-ERG20-F | GTTTACAAGAGAAGCAAATAGAGTTATAAAAAATAAGT        |
| ADH1-TEF1-R  | GGTGTGTGGGGGATCACTTCGGCATGCCGGTAGAGGTG        |
| ERG1-PGK1-F  | TTACAACAAATATAAAACAATGTCTGCTGTTAACGTTGC       |
| ERG1-ADH1-R  | CTTATTTTTTTTATAACTTTAACCAATCAACTCACCAAAC      |
| PGK1-CYC1-F  | GAAGGTTTTGGGACGCTCGACGCACAGATATTATAAC         |
| PGK1-ERG1-R  | GCAACGTTAACAGCAGACATTGTTTTATATTGTGTGTA        |
| ADH1-ERG1-F  | GTTTGGTGAGTTGATTGGTTAAAGTTATAAAAAATAAG        |
| ERG7-TEF1-F  | CTAAGTTTTAATTACAAATCCAAAAAAGTAAGAATTTTTG      |
| ERG7-CYC1-R  | CCTTTTCGGTTAGAGCGGATCCTCTGGCGAAGAATTGTTA      |
| TEF1-ADH1-F  | CACCTCTACCGGCATGCCGAAGTGATCCCCCACACACC        |
| TEF1-ERG7-R  | CAAAAATTCTTACTTTTTTTTGGATTTGTAATTAAACTTAG     |
| CYC1-ERG7-F  | TAACAATTCTTCGCCAGAGGATCCGCTCTAACCGAAAAGG      |
| CYC1-LEU-R   | CCTGACCATTTGATGGAGCGAGCGTCCCAAAACCTTCTC       |
| TY4-R2       | TGTTGATAATTAGAGGTT                            |
| TY4-2-LEU-F  | GCGTAAGGAGAAAATACCTATGAGGAATATGAGTCGTC        |
| LEU-CYC1-F   | GAGAAGGTTTTGGGACGCTCGCTCCATCAAATGGTCAGG       |
| LEU-TY4-2-R  | GACGACTCATATTCCTCATAGGTATTTTCTCCTTACGC        |
| S28-400F     | GACTACTTAGACTGCTTCGG                          |
| TEF1-ERG9-R  | CAATTGTAATAGCTTTCCCATTTTGTAATTAAACTTAGATTAGA  |
| PGK1-CYC1-F  | GAAGGTTTTGGGACGCTCGACGCACAGATATTATAAC         |
| S1319-400R   | GTGAGAACAGGCTGTTGTTG                          |
| TEF1-ERG9-R  | CAATTGTAATAGCTTTCCCATTTTGTAATTAAACTTAGATTAGA  |
| ERG9-TEF1-F  | TCTAATCTAAGTTTTAATTACAAAATGGGAAAGCTATTACAATTG |

|                     |                                                                               |
|---------------------|-------------------------------------------------------------------------------|
| ERG9-CYC1-R         | CTTTTCGGTTAGAGCGGATTACGCTCTGTGTAAAGTG                                         |
| CYC1-ERG9-F         | CACTTTACACAGAGCGTGAATCCGCTCTAACCGAAAAG                                        |
| CYC1-PGK1-R         | GTTATAATATCTGTGCGTCGAGCGTCCCAAAACCTTC                                         |
| rDNA1-MQWD-F        | GCGGATCCCGGCGGCCGCACGAGCTCGTCCCGCGGGGAATGAGAGTAGCAA<br>ACGTAAG                |
| rDNA1-MQWD-R        | CCCTCGAGGGAAAAGTACTTTTCGTCGACGCGTTGTCGCTCTGCCTTAACTA<br>CG                    |
| GJ-rDNA1-2 $\mu$ -F | CACGAGGCCCTTTCGTCGCGGATCCCGGCGGCCGC                                           |
| GJ-rDNA2-PUC-R      | CACATGTTCTTTCCTGCGTCCCCGCGGGACGAGCTCGTG                                       |
| PUC-GJ-rDNA2-F      | CACGAGCTCGTCCCGCGGGGACGCAGGAAAGAACATGTG                                       |
| 2 $\mu$ -GJ-rDNA1-R | GCGGCCGCCGGGATCCGCGACGAAAGGGCCTCGTG                                           |
| rDNA2-TRP-F         | GAATAGACCGAGATAGGGTTGGAGAGGGCAAAAGAAAATAAAAG                                  |
| rDNA2-MQWD-R        | TCCCCGCGGGACGAGCTCGTGCGGCCCGGGGATCCGCTTTCCTCTAATCAG<br>GTTCCAC                |
| TRP-MQWD-F          | TTAAGGCAGAGCGACAACGCGTCGACGAAAAGTACTTTTCCCTCGAGGGTC<br>GCGCGTTTCGGTGATGACGGTG |
| TRP-rDNA2-R         | CTTTTATTTTCTTTTGCCCTCTCCAACCCTATCTCGGTCTATTC                                  |
| GJ-F                | GGCAGAGCGACAACGCGTCGACAGTGATCCCCCACACCATAG                                    |
| GJ-R                | TAATATCTGTGCGTCCCTCGAGCGAGCGTCCCAAAACCTTCTC                                   |
| TEF1-BIP-R          | CGCTTAGTCTGTTGAAAAACATTTTTGTAATTAAAACTTAGATTAGA                               |
| BIP-TEF1-F          | TCTAATCTAAGTTTTAATTACAAAAATGTTTTTCAACAGACTAAGCG                               |
| BIP-CYC1-R          | TTCTTTTCGGTTAGAGCGGATCTACAATTCGTCGTGTTTCGAAATAATC                             |
| CYC1-BIP-F          | GATTATTTTGAACACGACGAATTGTAGATCCGCTCTAACCGAAAAGGAA                             |
| TEF1-HAC1-R         | CAAAATCAGTCATTTCCATTTTTGTAATTAAAACTTAGATTAGA                                  |
| HAC1-TEF1-F         | TCTAATCTAAGTTTTAATTACAAAAATGGAAATGACTGATTTTG                                  |
| HAC1-CYC1-R         | TTCTTTTCGGTTAGAGCGGATTCATGAAGTGATGAAGAAATC                                    |
| CYC1-HAC1-F         | GATTTCTTCATCACTTCATGAATCCGCTCTAACCGAAAAGGAA                                   |
| TEF1-PDI1-R         | GCACCAGCAGAAAACCTTCATTTTTGTAATTAAAACTTAGATTAGA                                |

---

---

|                   |                                                                 |
|-------------------|-----------------------------------------------------------------|
| PDI1-TEF1-F       | TCTAATCTAAGTTTTAATTACAAAAATGAAGTTTTCTGCTGGTGC                   |
| PDI1-CYC1-R       | TTCCTTTTCGGTTAGAGCGGATTTACAATTCATCGTGAATGGC                     |
| CYC1-PDI1-F       | GCCATTCACGATGAATTGTAAATCCGCTCTAACCGAAAAGGAA                     |
| TEF1-SUP4t-MSC-F  | GTGCTTTTTTTGTTTTTTATGTCTGTGACAAGCTTAGTGATCCCCACACAC<br>CATAG    |
| TEF1-Cas9-R       | CGTCGTGGTCCTTATAGTCCATTTTTGTAATTA AAACTTAGATTAG                 |
| Cas9-TEF1-F       | CTAATCTAAGTTTTAATTACAAAAATGGACTATAAGGACCACGACG                  |
| Cas9-ADH2-R       | CTATAAATCGTAAAGACATAAGAGATCCGCTTACTTTTTCTTTTTGCCTGG             |
| ADH2- Cas9-F      | CCAGGCAAAAAAGAAAAAGTAAGCGGATCTCTTATGTCTTACGATTATA<br>G          |
| ADH2-pESC-R       | CGTTGGCCGATTCATTAATGCAGCTGTTACCGTTATCTCCCTTATAC                 |
| pESC-ADH2-F       | GTATAAGGGAGATAACGGTAACAGCTGCATTAATGAATCGGCCAACG                 |
| pESC-SNR52P-MCS-R | CATACATTATCTTTTCAAAGAGCGGCCGCGGATCCCAGCTGGCGTAATAGCG<br>AAGAGG  |
| SNR52p-MSC-pESC-F | CCTCTTCGCTATTACGCCAGCTGGGATCCGCGGCCGCTCTTTGAAAAGATAA<br>TGTATG  |
| SUP4t-MSC-TEF1-R  | CTATGGTGTGTGGGGGATCACTAAGCTTGTGCGACAGACATAAAAAACAAAA<br>AAAGCAC |

---



---

**Table S3 Primers used for construction of gene deletion cassettes**

---

| Primer  | Sequence (5' to 3')                             |
|---------|-------------------------------------------------|
| HXK2-1F | CCAAAAAACCACAAGCCAGAAAGG                        |
| HXK2-1R | ATATTAAGGGTTGTCGACCTGCCAAAGAGTCGGCAATAAATTCCCAC |
| HXK2-2F | CAGATCCACTAGTGGCCTATGCCCCAGCCAGAATCGAGGAAG      |
| HXK2-2R | AATAACAGCGGCACCAGCAC                            |
| SER3-1F | AATCTTTCATGAATACCGTTCCACAGC                     |
| SER3-1R | ATATTAAGGGTTGTCGACCTGCGGAGAAAGGCGAGTTGAAAACAGCA |
| SER3-2F | CAGATCCACTAGTGGCCTATGCACATTCCATCTTTGATCCAAGCCGT |
| SER3-2R | CGGTCTTCAAAACACCTGGTACATT                       |
| SOR1-1F | TCGAGCAAAGACCAATCCCTACCAT                       |
| SOR1-1R | ATATTAAGGGTTGTCGACCTGCCGACACAAGCGCCCTCTTCATAACT |
| SOR1-2F | CAGATCCACTAGTGGCCTATGCGCTACAGAGAGCAAAAGATTTCGGA |
| SOR1-2R | ACAGCGTCACGATAATCACCGAATG                       |
| Kan-F   | CAGCTGAAGCTTCGTACGC                             |
| Kan-R   | GCATAGGCCACTAGTGGATCTG                          |

---

**Table S4 Primers used for qPCR**

| Primer   | Sequence (5' → 3')   |
|----------|----------------------|
| DS-qF    | GGGCAGAAGATCCCAATGGT |
| DS-qR    | TCAGAGAAAGTCCACGCACC |
| actin-qF | ACCCTGTTCTTTTGACGG   |
| actin-qR | GCAGTGGTGGAGAAAGAG   |

---

---

**Table S5 The HPLC conditions used in this study**

| Method | Gradient                                                                                             | Product                                                             |
|--------|------------------------------------------------------------------------------------------------------|---------------------------------------------------------------------|
| 1      | 0 min, 32%; 10 min, 32%; 20 min, 85%; 25 min, 100%;<br>26 min, 32%; 35 min, 32% ACN-H <sub>2</sub> O | 3 $\beta$ - <i>O</i> -Glc-DM                                        |
|        |                                                                                                      | 20 <i>S</i> - <i>O</i> -Glc-DM<br>(products of enzyme reactions)    |
| 2      | 0-40 min, 58% ACN-H <sub>2</sub> O                                                                   | 3 $\beta$ - <i>O</i> -Glc-DM                                        |
|        |                                                                                                      | 20 <i>S</i> - <i>O</i> -Glc-DM<br>(extracts of yeast fermentations) |

**Table S6  $^1\text{H}$ -NMR (600 MHz) and  $^{13}\text{C}$ -NMR (150 MHz) spectral data of 3 $\beta$ -*O*-Glc-DM produced by *in vitro* reaction in methanol- $d_4$**

| C                   | $\delta_{\text{C}}$ | $\delta_{\text{H}}$ (mult, $J$ in Hz)                             |
|---------------------|---------------------|-------------------------------------------------------------------|
| 1                   | 40.19               | 1.67 (1H, m); 0.96 (1H, m)                                        |
| 2                   | 27.03               | 1.93 (1H, m); 1.73 (1H, m)                                        |
| 3                   | 90.58               | 3.18 (1H, m)                                                      |
| 4                   | 41.54               |                                                                   |
| 5                   | 57.49               | 0.78 (1H, m)                                                      |
| 6                   | 19.07               | 1.44 (2H, m)                                                      |
| 7                   | 36.28               | 1.56 (1H, m); 1.28 (1H, m)                                        |
| 8                   | 37.82               |                                                                   |
| 9                   | 51.94               | 1.38 (1H, m)                                                      |
| 10                  | 40.13               |                                                                   |
| 11                  | 32.11               | 1.51 (1H, m); 1.07 (1H, m)                                        |
| 12                  | 25.69               | 1.53 (2H, m)                                                      |
| 13                  | 43.33               | 1.73 (1H, m)                                                      |
| 14                  | 51.30               |                                                                   |
| 15                  | 28.61               | 1.86 (1H, m); 0.96 (1H, s)                                        |
| 16                  | 25.57               | 1.71 (1H, m); 1.54 (1H, m)                                        |
| 17                  | 50.33               | 1.74 (1H, m)                                                      |
| 18                  | 16.80               | 0.91 (3H, s)                                                      |
| 19                  | 16.67               | 0.84 (3H, s)                                                      |
| 20                  | 75.82               |                                                                   |
| 21                  | 22.51               | 1.12 (3H, s)                                                      |
| 22                  | 42.22               | 1.43 (2H, m)                                                      |
| 23                  | 23.38               | 2.03 (2H, m)                                                      |
| 24                  | 125.77              | 5.10 (1H, t, $J = 7.2$ Hz)                                        |
| 25                  | 131.72              |                                                                   |
| 26                  | 25.00               | 1.68 (3H, s)                                                      |
| 27                  | 17.53               | 1.62 (3H, s)                                                      |
| 28                  | 28.21               | 1.04 (3H, s)                                                      |
| 29                  | 16.60               | 0.85 (3H, s)                                                      |
| 30                  | 15.84               | 1.00 (3H, s)                                                      |
| 3- <i>O</i> -Glc-1' | 106.52              | 4.32 (1H, d, $J = 7.8$ Hz)                                        |
| 2'                  | 76.02               | 3.18 (1H, m)                                                      |
| 3'                  | 78.09               | 3.34 (1H, m)                                                      |
| 4'                  | 71.47               | 3.24 (1H, m)                                                      |
| 5'                  | 77.48               | 3.17 (1H, m)                                                      |
| 6'                  | 62.61               | 3.84 (1H, dd, $J = 12.0, 2.4$ Hz); 3.66 (1H, br d, $J = 12.0$ Hz) |

**Table S7  $^1\text{H}$ -NMR (600 MHz) and  $^{13}\text{C}$ -NMR (150 MHz) spectral data of 20*S*-*O*-Glc-DM produced by *in vitro* reaction in methanol- $d_4$**

| C                    | $\delta_{\text{C}}$ | $\delta_{\text{H}}$ (mult, $J$ in Hz)                             |
|----------------------|---------------------|-------------------------------------------------------------------|
| 1                    | 40.19               | 1.69 (1H, m); 0.91 (1H, m)                                        |
| 2                    | 27.88               | 1.53 (2H, m)                                                      |
| 3                    | 79.45               | 3.13 (1H, m)                                                      |
| 4                    | 40.65               |                                                                   |
| 5                    | 57.21               | 0.74 (1H, m)                                                      |
| 6                    | 19.25               | 1.38 (2H, m)                                                      |
| 7                    | 36.30               | 1.54 (1H, m); 1.28 (1H, m)                                        |
| 8                    | 41.44               |                                                                   |
| 9                    | 51.99               | 1.37 (1H, m)                                                      |
| 10                   | 39.87               |                                                                   |
| 11                   | 22.56               | 1.48 (2H, m)                                                      |
| 12                   | 25.77               | 1.73 (2H, m)                                                      |
| 13                   | 43.30               | 1.75 (1H, m)                                                      |
| 14                   | 51.30               |                                                                   |
| 15                   | 32.08               | 1.47 (1H, m); 1.01 (1H, m)                                        |
| 16                   | 28.65               | 1.83 (1H, m); 1.58 (1H, m)                                        |
| 17                   | 49.23               | 1.95 (1H, m)                                                      |
| 18                   | 16.64               | 0.88 (3H, s)                                                      |
| 19                   | 15.91               | 0.77 (3H, s)                                                      |
| 20                   | 83.55               |                                                                   |
| 21                   | 21.52               | 1.24 (3H, s)                                                      |
| 22                   | 40.65               | 1.49 (2H, m)                                                      |
| 23                   | 23.56               | 2.10 (2H, m)                                                      |
| 24                   | 126.10              | 5.08 (1H, t, $J = 7.2$ Hz)                                        |
| 25                   | 131.50              |                                                                   |
| 26                   | 25.71               | 1.66 (3H, s)                                                      |
| 27                   | 17.74               | 1.61 (3H, s)                                                      |
| 28                   | 28.41               | 0.95 (3H, s)                                                      |
| 29                   | 15.89               | 1.00 (3H, s)                                                      |
| 30                   | 16.85               | 0.91 (3H, s)                                                      |
| 20- <i>O</i> -Glc-1' | 98.33               | 4.48 (1H, d, $J = 7.8$ Hz)                                        |
| 2'                   | 75.37               | 3.13 (1H, m)                                                      |
| 3'                   | 78.36               | 3.34 (1H, m)                                                      |
| 4'                   | 71.62               | 3.28 (1H, m)                                                      |
| 5'                   | 77.23               | 3.20 (1H, m)                                                      |
| 6'                   | 62.78               | 3.80 (1H, dd, $J = 12.0, 2.4$ Hz); 3.64 (1H, br d, $J = 12.0$ Hz) |

**Table S8  $^1\text{H}$ -NMR (600 MHz) and  $^{13}\text{C}$ -NMR (150 MHz) spectral data of 3 $\beta$ -*O*-Glc-DM produced by engineered yeast in methanol- $d_4$**

| C                   | $\delta_{\text{C}}$ | $\delta_{\text{H}}$ (mult, $J$ in Hz)                             |
|---------------------|---------------------|-------------------------------------------------------------------|
| 1                   | 40.19               | 1.67 (1H, s); 0.96 (1H, m)                                        |
| 2                   | 27.03               | 1.91 (1H, m); 1.67 (1H, m)                                        |
| 3                   | 90.58               | 3.18 (1H, m)                                                      |
| 4                   | 41.54               |                                                                   |
| 5                   | 57.49               | 0.78 (1H, m)                                                      |
| 6                   | 19.07               | 1.49 (2H, m)                                                      |
| 7                   | 36.28               | 1.57 (1H, m); 1.28 (1H, m)                                        |
| 8                   | 37.82               |                                                                   |
| 9                   | 51.94               | 1.38 (1H, m)                                                      |
| 10                  | 40.06               |                                                                   |
| 11                  | 32.11               | 1.47 (1H, m); 1.05 (1H, m)                                        |
| 12                  | 25.57               | 1.51 (2H, m)                                                      |
| 13                  | 43.33               | 1.73 (1H, m)                                                      |
| 14                  | 51.30               |                                                                   |
| 15                  | 28.61               | 1.84 (1H, m); 0.96 (1H, s)                                        |
| 16                  | 25.70               | 1.68 (1H, m); 1.47 (1H, m)                                        |
| 17                  | 50.33               | 1.74 (1H, m)                                                      |
| 18                  | 16.67               | 0.90 (3H, s)                                                      |
| 19                  | 16.80               | 0.84 (3H, s)                                                      |
| 20                  | 75.82               |                                                                   |
| 21                  | 23.39               | 1.68 (3H, s)                                                      |
| 22                  | 42.22               | 1.46 (2H, m)                                                      |
| 23                  | 22.51               | 2.03 (2H, m)                                                      |
| 24                  | 125.77              | 5.10 (1H, t, $J = 7.2$ Hz)                                        |
| 25                  | 131.72              |                                                                   |
| 26                  | 25.00               | 1.12 (3H, s)                                                      |
| 27                  | 17.53               | 1.62 (3H, s)                                                      |
| 28                  | 28.21               | 1.04 (3H, s)                                                      |
| 29                  | 16.60               | 0.91 (3H, s)                                                      |
| 30                  | 15.84               | 1.00 (3H, s)                                                      |
| 3- <i>O</i> -Glc-1' | 106.52              | 4.32 (1H, d, $J = 7.8$ Hz)                                        |
| 2'                  | 76.00               | 3.18 (1H, m)                                                      |
| 3'                  | 78.09               | 3.34 (1H, m)                                                      |
| 4'                  | 71.47               | 3.25 (1H, m)                                                      |
| 5'                  | 77.48               | 3.17 (1H, m)                                                      |
| 6'                  | 62.61               | 3.84 (1H, dd, $J = 12.0, 2.4$ Hz); 3.65 (1H, br d, $J = 12.0$ Hz) |

**Table S9  $^1\text{H}$ -NMR (600 MHz) and  $^{13}\text{C}$ -NMR (150 MHz) spectral data of 20*S*-*O*-Glc-DM produced by engineered yeast in methanol- $d_4$**

| C                    | $\delta_{\text{C}}$ | $\delta_{\text{H}}$ (mult, $J$ in Hz)                             |
|----------------------|---------------------|-------------------------------------------------------------------|
| 1                    | 40.19               | 1.70 (1H, m); 0.91 (1H, m)                                        |
| 2                    | 27.88               | 1.53 (2H, m)                                                      |
| 3                    | 79.45               | 3.12 (1H, m)                                                      |
| 4                    | 40.65               |                                                                   |
| 5                    | 57.21               | 0.75 (1H, m)                                                      |
| 6                    | 19.25               | 1.45 (2H, m)                                                      |
| 7                    | 36.30               | 1.54 (1H, m); 1.28 (1H, m)                                        |
| 8                    | 41.44               |                                                                   |
| 9                    | 51.99               | 1.38 (1H, m)                                                      |
| 10                   | 39.87               |                                                                   |
| 11                   | 22.56               | 1.53 (2H, m)                                                      |
| 12                   | 25.77               | 1.73 (2H, m)                                                      |
| 13                   | 43.30               | 1.74 (1H, m)                                                      |
| 14                   | 51.30               |                                                                   |
| 15                   | 32.08               | 1.48 (1H, m); 1.01 (1H, m)                                        |
| 16                   | 28.65               | 1.83 (1H, m); 1.26 (1H, m)                                        |
| 17                   | 49.08               | 1.94 (1H, m)                                                      |
| 18                   | 16.64               | 0.88 (3H, s)                                                      |
| 19                   | 15.91               | 0.77 (3H, s)                                                      |
| 20                   | 83.55               |                                                                   |
| 21                   | 21.52               | 1.24 (3H, s)                                                      |
| 22                   | 40.65               | 1.49 (2H, m)                                                      |
| 23                   | 23.56               | 2.10 (2H, m)                                                      |
| 24                   | 126.10              | 5.09 (1H, t, $J = 7.2$ Hz)                                        |
| 25                   | 131.50              |                                                                   |
| 26                   | 25.71               | 1.68 (3H, s)                                                      |
| 27                   | 17.74               | 1.61 (3H, s)                                                      |
| 28                   | 28.41               | 0.96 (3H, s)                                                      |
| 29                   | 15.89               | 1.00 (3H, s)                                                      |
| 30                   | 16.85               | 0.91 (3H, s)                                                      |
| 20- <i>O</i> -Glc-1' | 98.33               | 4.47 (1H, d, $J = 7.8$ Hz)                                        |
| 2'                   | 75.37               | 3.13 (1H, m)                                                      |
| 3'                   | 78.36               | 3.33 (1H, m)                                                      |
| 4'                   | 71.62               | 3.28 (1H, m)                                                      |
| 5'                   | 77.23               | 3.20 (1H, m)                                                      |
| 6'                   | 62.78               | 3.78 (1H, dd, $J = 12.0, 2.4$ Hz); 3.63 (1H, br d, $J = 12.0$ Hz) |
